# Supplementary material for: Was misst der Wahl-O-Mat
Source: Atypon-hosted journal article supplement (doi:10.1026/0012-1924/a000330), 2024-04-03
Supplement: 0012-1924_a000330_esm2.pdf [file 0012-1924_a000330_esm2.pdf]

**ESM 2: Ladungstabelle der 8- 7- 6- 5- 4- 2- und 1-Faktoren EFA aller drei Stichproben.**

Die jeweils erste Tabelle enthält die Ladungen der Übereinstimmungen mit den jeweiligen Parteien auf die drei extrahierten Faktoren. Die jeweils zweite Tabelle beschreibt die Charakteristika der Faktoren inklusive der relativen Varianzaufklärung. Die dritte Tabelle zeigt die Faktorkorrelationen.

**Legende:** MLX = Faktor Nummer X, h2 = Kommunalität, u2 = Unaufgeklärte Varianz an einem Item, com = Hoffmans Komplexitätsindex

## Explorative Faktoranalyse – Erste Stichprobe – 8 Faktoren

Standardisierte Ladungsmatrix basierend auf der Korrelationsmatrix

| item                  | ML1      | ML2   | ML6  | ML8   | ML7  | ML3 | ML4   | ML5   | h2    | u2    | com |
|-----------------------|----------|-------|------|-------|------|-----|-------|-------|-------|-------|-----|
| CDU / CSU             | 7 -1.09  |       |      |       |      |     |       |       | .91   | .0906 | 1.1 |
| ÖDP                   | 26 1.02  | -0.28 |      | 0.40  |      |     |       |       | .99   | .0050 | 1.6 |
| SGP                   | 29 1.01  |       | 0.34 |       |      |     | 0.39  | .99   | .0051 | 1.6   |     |
| DKP                   | 14 0.99  |       |      |       |      |     |       | 0.22  | .96   | .0412 | 1.2 |
| du.                   | 15 0.93  |       |      |       |      |     |       |       | .97   | .0340 | 1.0 |
| FDP                   | 16 -0.92 | 0.33  |      |       |      |     |       | 0.24  | .73   | .2708 | 1.6 |
| DIE LINKE             | 11 0.92  |       |      |       |      |     |       |       | .99   | .0142 | 1.0 |
| DiB                   | 8 0.91   |       |      |       |      |     |       |       | .96   | .0390 | 1.1 |
| FREIE WÄHLER          | 17 -0.86 | 0.23  | 0.31 |       |      |     |       |       | .85   | .1500 | 1.5 |
| Die PARTEI            | 12 0.84  |       |      |       |      |     | 0.21  |       | .95   | .0512 | 1.2 |
| GRÜNE                 | 18 0.83  |       |      |       |      |     |       |       | .97   | .0252 | 1.2 |
| AfD                   | 1 -0.82  | 0.23  |      |       |      |     |       |       | .96   | .0405 | 1.2 |
| Bündnis C             | 3 -0.81  |       |      | 0.31  | 0.26 |     |       |       | .90   | .1025 | 1.6 |
| BP                    | 2 -0.80  | 0.34  |      |       |      |     |       | -0.21 | .94   | .0647 | 1.7 |
| Tierschutzpartei      | 33 0.79  |       |      |       |      |     | 0.22  |       | 1.0   | .0048 | 1.3 |
| V-Partei <sup>3</sup> | 35 0.76  |       | 0.23 |       |      |     | 0.25  |       | .98   | .0227 | 1.4 |
| Volt                  | 36 0.75  |       |      |       |      |     |       |       | .89   | .1141 | 1.2 |
| MLPD                  | 24 0.75  |       | 0.23 |       |      |     |       |       | .99   | .0122 | 1.6 |
| SSW                   | 31 0.72  |       |      |       | 0.49 |     |       |       | .84   | .1611 | 1.9 |
| LfK                   | 20 0.70  |       |      |       |      |     |       |       | .72   | .2841 | 1.2 |
| LKR                   | 22 -0.69 | 0.35  |      |       |      |     |       |       | .89   | .1123 | 1.7 |
| Tierschutzallianz     | 32 0.58  | 0.40  | 0.38 |       |      |     |       |       | .76   | .2365 | 3.0 |
| BÜNDNIS21             | 4 -0.51  |       |      | 0.38  |      |     |       |       | .72   | .2820 | 2.7 |
| Die Grauen            | 9        | 1.00  |      | -0.23 |      |     |       |       | .85   | .1466 | 1.1 |
| UNABHÄNGIGE           | 34       | 0.86  |      |       |      |     |       |       | .89   | .1099 | 1.1 |
| NPD                   | 25       | 0.82  |      |       |      |     |       |       | .91   | .0938 | 1.3 |
| dieBasis              | 13       | 0.76  |      | 0.23  |      |     |       | -0.30 | .86   | .1426 | 1.6 |
| III. Weg              | 19       | 0.71  |      |       |      |     |       |       | .93   | .0742 | 1.4 |
| BÜRGERBEWEGUNG        | 5 -0.34  | 0.60  |      |       | 0.30 |     | -0.23 |       | .74   | .2625 | 2.7 |
| PdF                   | 27       |       | 0.87 |       |      |     |       |       | .55   | .4465 | 1.2 |
| Die Humanisten        | 10       |       | 0.63 |       |      |     |       |       | .69   | .3146 | 1.6 |
| PIRATEN               | 28 0.47  |       | 0.48 |       |      |     | 0.43  |       | .82   | .1760 | 3.1 |
| BüSo                  | 6 -0.26  |       |      | 0.81  |      |     |       |       | .69   | .3098 | 1.5 |
| MENSCHLICHE WELT      | 23 0.50  | 0.31  |      | 0.62  |      |     |       |       | .71   | .2932 | 2.8 |
| SPD                   | 30 0.37  |       |      |       | 0.41 |     |       |       | .72   | .2846 | 3.3 |

LIEBE 21 0.97 .96 .0431 1.2

|                    | ML1   | ML2  | ML6  | ML8  | ML7  | ML3  | ML4  | ML5  |
|--------------------|-------|------|------|------|------|------|------|------|
| SS Ladungen        | 18.10 | 5.35 | 2.46 | 1.68 | 1.29 | 1.13 | 0.61 | 0.52 |
| Anteilige Var.     | .50   | .15  | .07  | .05  | .04  | .03  | .02  | .01  |
| Kumulative Var.    | .50   | .65  | .72  | .77  | .80  | .83  | .85  | .86  |
| Anteil Erklärt     | .58   | .17  | .08  | .05  | .04  | .04  | .02  | .02  |
| Kumulativer Anteil | .58   | .75  | .83  | .89  | .93  | .96  | .98  | 1.00 |

Mit folgenden Faktorkorrelationen

|     | ML1  | ML2  | ML6  | ML8  | ML7  | ML3  | ML4  | ML5  |
|-----|------|------|------|------|------|------|------|------|
| ML1 | 1.00 | -.53 | .51  | -.31 | .26  | .04  | -.01 | -.09 |
| ML2 | -.53 | 1.00 | -.05 | .48  | -.16 | .10  | -.17 | .00  |
| ML6 | .51  | -.05 | 1.00 | -.15 | .49  | .25  | -.08 | .28  |
| ML8 | -.31 | .48  | -.15 | 1.00 | -.23 | -.07 | -.05 | -.36 |
| ML7 | .26  | -.16 | .49  | -.23 | 1.00 | .16  | .06  | .16  |
| ML3 | .04  | .10  | .25  | -.07 | .16  | 1.00 | -.04 | -.02 |
| ML4 | -.01 | -.17 | -.08 | -.05 | .06  | -.04 | 1.00 | .13  |
| ML5 | -.09 | .00  | .28  | -.36 | .16  | -.02 | .13  | 1.00 |

## Erste Stichprobe – 7 Faktoren

Standardisierte Ladungsmatrix basierend auf der Korrelationsmatrix

|                       | item | ML1   | ML3  | ML5  | ML6   | ML2 | ML7  | ML4 | h2  | u2    | com |
|-----------------------|------|-------|------|------|-------|-----|------|-----|-----|-------|-----|
| FDP                   | 16   | -1.04 |      | 0.48 |       |     |      |     | .74 | .2595 | 1.5 |
| CDU / CSU             | 7    | -1.04 |      |      |       |     |      |     | .90 | .1039 | 1.1 |
| FREIE WÄHLER          | 17   | -0.96 |      | 0.45 |       |     |      |     | .85 | .1521 | 1.5 |
| du.                   | 15   | 0.91  |      |      |       |     |      |     | .97 | .0337 | 1.0 |
| DKP                   | 14   | 0.91  |      | 0.22 |       |     |      |     | .96 | .0447 | 1.3 |
| DIE LINKE             | 11   | 0.90  |      |      |       |     |      |     | .99 | .0113 | 1.1 |
| Bündnis C             | 3    | -0.89 |      |      | 0.28  |     |      |     | .89 | .1107 | 1.4 |
| DiB                   | 8    | 0.87  |      |      |       |     |      |     | .96 | .0376 | 1.1 |
| MLPD                  | 24   | 0.86  |      |      |       |     | 0.22 |     | .95 | .0530 | 1.3 |
| SGP                   | 29   | 0.83  |      | 0.30 | 0.27  |     |      |     | .97 | .0289 | 1.7 |
| AfD                   | 1    | -0.82 | 0.23 |      |       |     |      |     | .96 | .0411 | 1.2 |
| BP                    | 2    | -0.80 | 0.34 |      |       |     |      |     | .94 | .0635 | 1.6 |
| GRÜNE                 | 18   | 0.79  |      |      |       |     |      |     | .97 | .0295 | 1.2 |
| Die PARTEI            | 12   | 0.79  |      | 0.22 |       |     |      |     | .95 | .0507 | 1.3 |
| LfK                   | 20   | 0.78  |      |      |       |     |      |     | .68 | .3203 | 1.1 |
| ÖDP                   | 26   | 0.78  |      |      |       |     |      |     | .89 | .1135 | 1.2 |
| Tierschutzpartei      | 33   | 0.77  |      | 0.22 |       |     |      |     | .99 | .0069 | 1.3 |
| LKR                   | 22   | -0.71 | 0.36 |      |       |     |      |     | .89 | .1101 | 1.7 |
| Volt                  | 36   | 0.70  |      | 0.23 |       |     |      |     | .89 | .1097 | 1.4 |
| V-Partei <sup>3</sup> | 35   | 0.69  |      | 0.35 |       |     |      |     | .98 | .0220 | 1.7 |
| Tierschutzallianz     | 32   | 0.59  | 0.42 | 0.39 |       |     |      |     | .73 | .2664 | 3.1 |
| BÜNDNIS21             | 4    | -0.54 |      |      | 0.39  |     |      |     | .73 | .2687 | 2.6 |
| SSW                   | 31   | 0.50  |      | 0.37 |       |     | 0.22 |     | .76 | .2408 | 2.4 |
| Die Grauen            | 9    |       | 1.02 |      | -0.25 |     |      |     | .85 | .1452 | 1.2 |
| NPD                   | 25   |       | 0.86 |      |       |     |      |     | .90 | .1025 | 1.3 |
| UNABHÄNGIGE           | 34   |       | 0.84 |      |       |     |      |     | .88 | .1152 | 1.1 |

|                  |    |       |       |       |      |      |      |       |     |       |     |
|------------------|----|-------|-------|-------|------|------|------|-------|-----|-------|-----|
| dieBasis         | 13 |       | 0.82  |       | 0.23 |      |      | 0.23  | .87 | .1257 | 1.4 |
| III. Weg         | 19 |       | 0.75  |       |      |      |      |       | .93 | .0722 | 1.4 |
| BÜRGERBEWEGUNG   | 5  | -0.47 | 0.49  |       |      |      | 0.32 | -0.20 | .74 | .2602 | 3.4 |
| PdF              | 27 |       |       | 0.75  |      |      |      |       | .47 | .5301 | 1.2 |
| Die Humanisten   | 10 |       |       | 0.74  |      |      |      |       | .69 | .3103 | 1.3 |
| PIRATEN          | 28 | 0.38  |       | 0.63  |      |      |      | 0.31  | .82 | .1751 | 2.4 |
| BüSo             | 6  | -0.33 | -0.24 |       | 0.81 |      |      |       | .74 | .2603 | 1.5 |
| MENSCHLICHE WELT | 23 | 0.56  | 0.37  |       | 0.63 |      |      |       | .69 | .3125 | 2.8 |
| LIEBE            | 21 | -0.24 |       | -0.21 |      | 1.00 |      |       | 1.0 | .0050 | 1.2 |
| SPD              | 30 | 0.33  | -0.21 | 0.29  |      |      | 0.48 |       | .76 | .2421 | 3.1 |

|                    |  |       |      |      |      |      |      |      |  |  |  |
|--------------------|--|-------|------|------|------|------|------|------|--|--|--|
|                    |  | ML1   | ML3  | ML5  | ML6  | ML2  | ML7  | ML4  |  |  |  |
| SS Ladungen        |  | 17.67 | 5.47 | 3.63 | 1.67 | 1.13 | 0.81 | 0.49 |  |  |  |
| Anteilige Var.     |  | .49   | .15  | .10  | .05  | .03  | .02  | .01  |  |  |  |
| Kumulative Var.    |  | .49   | .64  | .74  | .79  | .82  | .84  | .86  |  |  |  |
| Anteil Erklärt     |  | .57   | .18  | .12  | .05  | .04  | .03  | .02  |  |  |  |
| Kumulativer Anteil |  | .57   | .75  | .87  | .92  | .96  | .98  | 1.00 |  |  |  |

Mit folgenden Faktorkorrelationen

|     |      |      |      |      |      |      |      |  |
|-----|------|------|------|------|------|------|------|--|
|     | ML1  | ML3  | ML5  | ML6  | ML2  | ML7  | ML4  |  |
| ML1 | 1.00 | -.54 | .53  | -.29 | .10  | .16  | .16  |  |
| ML3 | -.54 | 1.00 | -.21 | .51  | .01  | .05  | -.22 |  |
| ML5 | .53  | -.21 | 1.00 | -.21 | .31  | .09  | -.06 |  |
| ML6 | -.29 | .51  | -.21 | 1.00 | -.14 | .08  | .09  |  |
| ML2 | .10  | .01  | .31  | -.14 | 1.00 | .04  | -.02 |  |
| ML7 | .16  | .05  | .09  | .08  | .04  | 1.00 | .19  |  |
| ML4 | .16  | -.22 | -.06 | .09  | -.02 | .19  | 1.00 |  |

## Erste Stichprobe – 6 Faktoren

Standardisierte Ladungsmatrix basierend auf der Korrelationsmatrix

|              |      |       |      |      |      |      |     |     |       |     |
|--------------|------|-------|------|------|------|------|-----|-----|-------|-----|
|              | item | ML1   | ML4  | ML2  | ML5  | ML6  | ML3 | h2  | u2    | com |
| FDP          | 16   | -1.16 | 0.48 |      |      |      |     | .74 | .2556 | 1.4 |
| FREIE WÄHLER | 17   | -1.03 | 0.41 |      |      |      |     | .85 | .1516 | 1.4 |
| CDU / CSU    | 7    | -0.98 |      |      |      |      |     | .89 | .1103 | 1.1 |
| Bündnis C    | 3    | -0.87 |      |      | 0.33 |      |     | .89 | .1079 | 1.5 |
| MLPD         | 24   | 0.80  | 0.21 |      |      | 0.21 |     | .93 | .0659 | 1.3 |
| du.          | 15   | 0.79  | 0.27 |      |      |      |     | .97 | .0344 | 1.2 |
| DIE LINKE    | 11   | 0.79  | 0.25 |      |      |      |     | .99 | .0108 | 1.2 |
| DKP          | 14   | 0.75  | 0.41 |      |      |      |     | .96 | .0440 | 1.8 |
| AfD          | 1    | -0.74 |      | 0.21 |      |      |     | .96 | .0420 | 1.3 |
| DiB          | 8    | 0.74  | 0.31 |      |      |      |     | .96 | .0385 | 1.4 |
| LfK          | 20   | 0.70  |      |      |      |      |     | .67 | .3282 | 1.2 |
| ÖDP          | 26   | 0.69  | 0.25 |      |      |      |     | .88 | .1181 | 1.4 |

|                       |    |       |       |       |       |      |       |     |       |     |
|-----------------------|----|-------|-------|-------|-------|------|-------|-----|-------|-----|
| GRÜNE                 | 18 | 0.69  | 0.21  |       |       |      |       | .97 | .0331 | 1.4 |
| BP                    | 2  | -0.68 |       | 0.26  |       |      |       | .90 | .0961 | 1.5 |
| LKR                   | 22 | -0.65 |       | 0.32  |       |      |       | .87 | .1293 | 1.6 |
| Tierschutzpartei      | 33 | 0.64  | 0.34  |       |       |      |       | .99 | .0072 | 1.8 |
| Die PARTEI            | 12 | 0.63  | 0.39  |       |       |      |       | .94 | .0556 | 1.9 |
| SGP                   | 29 | 0.62  | 0.53  |       | 0.21  |      |       | .97 | .0266 | 2.4 |
| Volt                  | 36 | 0.55  | 0.38  |       |       |      |       | .89 | .1089 | 2.0 |
| BÜNDNIS21             | 4  | -0.53 |       | 0.22  | 0.41  |      |       | .72 | .2821 | 2.6 |
| V-Partei <sup>3</sup> | 35 | 0.52  | 0.49  |       |       |      | 0.21  | .98 | .0216 | 2.4 |
| LIEBE                 | 21 | -0.40 |       |       | -0.27 |      |       | .23 | .7718 | 3.2 |
| PdF                   | 27 | -0.35 | 0.86  |       |       |      |       | .47 | .5304 | 1.4 |
| Die Humanisten        | 10 |       | 0.78  | -0.22 |       |      |       | .64 | .3632 | 1.4 |
| PIRATEN               | 28 |       | 0.76  |       |       |      | 0.34  | .82 | .1783 | 1.6 |
| Tierschutzallianz     | 32 | 0.46  | 0.52  | 0.45  | -0.23 |      |       | .74 | .2573 | 3.6 |
| SSW                   | 31 | 0.36  | 0.49  |       |       | 0.23 |       | .76 | .2358 | 2.5 |
| Die Grauen            | 9  |       |       | 1.01  | -0.26 |      |       | .88 | .1238 | 1.2 |
| UNABHÄNGIGE           | 34 |       |       | 0.87  |       |      |       | .88 | .1150 | 1.1 |
| dieBasis              | 13 |       |       | 0.83  | 0.27  |      |       | .88 | .1208 | 1.4 |
| NPD                   | 25 |       | -0.30 | 0.80  |       |      |       | .86 | .1399 | 1.4 |
| III. Weg              | 19 |       |       | 0.78  |       |      |       | .89 | .1062 | 1.3 |
| MENSCHLICHE WELT      | 23 | 0.45  | 0.27  | 0.52  | 0.52  |      |       | .63 | .3699 | 3.5 |
| BÜRGERBEWEGUNG        | 5  | -0.41 |       | 0.50  |       | 0.33 | -0.21 | .75 | .2538 | 3.3 |
| BüSo                  | 6  | -0.32 |       |       | 0.77  |      |       | .70 | .3026 | 1.4 |
| SPD                   | 30 | 0.21  | 0.46  | -0.22 |       | 0.48 |       | .76 | .2382 | 2.8 |

|                    | ML1   | ML4  | ML2  | ML5  | ML6 | ML3  |
|--------------------|-------|------|------|------|-----|------|
| SS Ladungen        | 15.16 | 6.15 | 5.56 | 1.71 | .70 | .54  |
| Anteilige Var.     | .42   | .17  | .15  | .05  | .02 | .02  |
| Kumulative Var.    | .42   | .59  | .75  | .79  | .81 | .83  |
| Anteil Erklärt     | .51   | .21  | .19  | .06  | .02 | .02  |
| Kumulativer Anteil | .51   | .71  | .90  | .96  | .98 | 1.00 |

Mit folgenden Faktorkorrelationen

|     | ML1  | ML4  | ML2  | ML5  | ML6  | ML3  |
|-----|------|------|------|------|------|------|
| ML1 | 1.00 | .62  | -.56 | -.22 | .04  | .18  |
| ML4 | .62  | 1.00 | -.30 | -.35 | .03  | .07  |
| ML2 | -.56 | -.30 | 1.00 | .38  | .12  | -.16 |
| ML5 | -.22 | -.35 | .38  | 1.00 | .09  | .04  |
| ML6 | .04  | .03  | .12  | .09  | 1.00 | .27  |
| ML3 | .18  | .07  | -.16 | .04  | .27  | 1.00 |

## Erste Stichprobe – 5 Faktoren

Standardisierte Ladungsmatrix basierend auf der Korrelationsmatrix

|                       | item | ML1   | ML4   | ML2   | ML5   | ML3   | h2  | u2   | com |
|-----------------------|------|-------|-------|-------|-------|-------|-----|------|-----|
| FDP                   | 16   | -1.17 | 0.44  |       |       |       | .73 | .274 | 1.3 |
| FREIE WÄHLER          | 17   | -1.04 | 0.41  |       |       |       | .85 | .148 | 1.4 |
| CDU / CSU             | 7    | -0.96 |       |       |       |       | .86 | .140 | 1.0 |
| Bündnis C             | 3    | -0.83 |       |       | 0.38  |       | .87 | .131 | 1.5 |
| MLPD                  | 24   | 0.77  | 0.27  |       |       |       | .90 | .098 | 1.4 |
| du.                   | 15   | 0.76  | 0.29  |       |       |       | .97 | .035 | 1.3 |
| DIE LINKE             | 11   | 0.75  | 0.29  |       |       |       | .99 | .013 | 1.3 |
| AfD                   | 1    | -0.72 |       | 0.21  |       |       | .96 | .043 | 1.3 |
| DKP                   | 14   | 0.71  | 0.43  |       |       | -0.22 | .95 | .046 | 2.0 |
| DiB                   | 8    | 0.71  | 0.34  |       |       |       | .96 | .039 | 1.5 |
| ÖDP                   | 26   | 0.69  | 0.26  |       |       |       | .88 | .119 | 1.4 |
| GRÜNE                 | 18   | 0.68  | 0.23  |       |       |       | .97 | .033 | 1.5 |
| LfK                   | 20   | 0.67  |       |       |       |       | .66 | .336 | 1.3 |
| LKR                   | 22   | -0.65 |       | 0.33  |       |       | .86 | .137 | 1.5 |
| BP                    | 2    | -0.65 |       | 0.25  |       |       | .89 | .109 | 1.6 |
| Tierschutzpartei      | 33   | 0.62  | 0.37  |       |       |       | .99 | .010 | 1.8 |
| Die PARTEI            | 12   | 0.61  | 0.41  |       |       |       | .95 | .055 | 1.9 |
| SGP                   | 29   | 0.59  | 0.52  |       |       | -0.25 | .95 | .050 | 2.5 |
| BÜNDNIS21             | 4    | -0.52 |       | 0.21  | 0.36  |       | .68 | .325 | 2.3 |
| Volt                  | 36   | 0.50  | 0.41  |       |       |       | .89 | .106 | 2.3 |
| LIEBE                 | 21   | -0.37 |       |       | -0.25 | 0.29  | .22 | .783 | 3.7 |
| PdF                   | 27   | -0.39 | 0.90  |       |       |       | .47 | .528 | 1.4 |
| Die Humanisten        | 10   | -0.28 | 0.82  | -0.21 |       |       | .67 | .335 | 1.5 |
| PIRATEN               | 28   |       | 0.78  |       |       | 0.26  | .81 | .195 | 1.3 |
| Tierschutzallianz     | 32   | 0.41  | 0.56  | 0.47  | -0.21 |       | .71 | .290 | 3.2 |
| SSW                   | 31   | 0.35  | 0.53  |       |       |       | .72 | .276 | 2.0 |
| SPD                   | 30   | 0.20  | 0.53  | -0.20 |       |       | .57 | .435 | 1.7 |
| V-Partei <sup>3</sup> | 35   | 0.50  | 0.50  |       |       |       | .97 | .027 | 2.2 |
| Die Grauen            | 9    |       |       | 1.02  | -0.29 |       | .89 | .112 | 1.2 |
| UNABHÄNGIGE           | 34   |       |       | 0.88  |       |       | .88 | .118 | 1.1 |
| dieBasis              | 13   |       |       | 0.80  | 0.35  |       | .87 | .127 | 1.6 |
| NPD                   | 25   |       | -0.31 | 0.78  |       |       | .84 | .163 | 1.3 |
| III. Weg              | 19   |       | -0.22 | 0.76  |       |       | .87 | .128 | 1.2 |
| BÜRGERBEWEGUNG        | 5    | -0.40 |       | 0.53  |       |       | .62 | .381 | 2.0 |
| BüSo                  | 6    | -0.29 |       |       | 0.75  |       | .66 | .341 | 1.5 |
| MENSCHLICHE WELT      | 23   | 0.45  | 0.29  | 0.50  | 0.54  |       | .64 | .360 | 3.7 |

|                    | ML1   | ML4  | ML2  | ML5  | ML3  |
|--------------------|-------|------|------|------|------|
| SS Ladungen        | 14.52 | 6.76 | 5.60 | 1.80 | 0.47 |
| Anteilige Var.     | .40   | .19  | .16  | .05  | .01  |
| Kumulative Var.    | .40   | .59  | .75  | .80  | .81  |
| Anteil Erklärt     | .50   | .23  | .19  | .06  | .02  |
| Kumulativer Anteil | .50   | .73  | .92  | .98  | 1.00 |

Mit folgenden Faktorkorrelationen

|     | ML1  | ML4 | ML2  | ML5  | ML3 |
|-----|------|-----|------|------|-----|
| ML1 | 1.00 | .65 | -.56 | -.24 | .12 |

|     |      |      |      |      |      |
|-----|------|------|------|------|------|
| ML4 | .65  | 1.00 | -.31 | -.33 | .04  |
| ML2 | -.56 | -.31 | 1.00 | .39  | -.13 |
| ML5 | -.24 | -.33 | .39  | 1.00 | .17  |
| ML3 | .12  | .04  | -.13 | .17  | 1.00 |

## Erste Stichprobe – 4 Faktoren

Standardisierte Ladungsmatrix basierend auf der Korrelationsmatrix

|                       | item | ML1   | ML4   | ML2   | ML3   | h2  | u2    | com |
|-----------------------|------|-------|-------|-------|-------|-----|-------|-----|
| FDP                   | 16   | 1.12  | 0.31  | -0.22 |       | .71 | .2890 | 1.2 |
| FREIE WÄHLER          | 17   | 1.02  | 0.29  |       |       | .84 | .1617 | 1.2 |
| CDU / CSU             | 7    | 0.83  |       |       |       | .86 | .1382 | 1.1 |
| MLPD                  | 24   | -0.71 | 0.35  |       |       | .88 | .1154 | 1.5 |
| Bündnis C             | 3    | 0.71  |       | 0.23  |       | .77 | .2279 | 1.3 |
| DIE LINKE             | 11   | -0.68 | 0.42  |       |       | .99 | .0084 | 1.7 |
| DKP                   | 14   | -0.67 | 0.55  |       |       | .94 | .0646 | 2.1 |
| du.                   | 15   | -0.64 | 0.41  |       |       | .97 | .0329 | 1.7 |
| AfD                   | 1    | 0.63  | -0.24 | 0.27  |       | .95 | .0505 | 1.7 |
| BP                    | 2    | 0.62  | -0.25 | 0.31  |       | .88 | .1211 | 1.9 |
| LfK                   | 20   | -0.62 | 0.33  |       |       | .66 | .3374 | 1.6 |
| LKR                   | 22   | 0.55  |       | 0.28  |       | .86 | .1428 | 1.8 |
| LIEBE                 | 21   | 0.54  |       |       | 0.25  | .16 | .8412 | 1.7 |
| DiB                   | 8    | -0.53 | 0.49  |       |       | .96 | .0433 | 2.1 |
| ÖDP                   | 26   | -0.53 | 0.32  |       | 0.25  | .88 | .1244 | 2.1 |
| GRÜNE                 | 18   | -0.48 | 0.32  |       | 0.25  | .96 | .0366 | 2.5 |
| BÜNDNIS21             | 4    | 0.38  |       | 0.36  |       | .61 | .3941 | 2.3 |
| Die Humanisten        | 10   | 0.34  | 0.90  | -0.31 |       | .67 | .3321 | 1.6 |
| PdF                   | 27   | 0.47  | 0.86  |       |       | .46 | .5405 | 1.6 |
| PIRATEN               | 28   |       | 0.80  |       | 0.43  | .82 | .1843 | 1.7 |
| Tierschutzallianz     | 32   | -0.22 | 0.78  | 0.30  |       | .67 | .3268 | 1.5 |
| SGP                   | 29   | -0.59 | 0.60  |       |       | .91 | .0859 | 2.2 |
| V-Partei <sup>3</sup> | 35   | -0.27 | 0.56  |       | 0.32  | .98 | .0237 | 2.1 |
| SSW                   | 31   | -0.22 | 0.56  |       |       | .71 | .2868 | 1.5 |
| SPD                   | 30   |       | 0.55  |       |       | .56 | .4436 | 1.3 |
| Volt                  | 36   | -0.43 | 0.53  |       |       | .90 | .1019 | 2.2 |
| Die PARTEI            | 12   | -0.39 | 0.50  |       | 0.27  | .94 | .0557 | 2.5 |
| Tierschutzpartei      | 33   | -0.41 | 0.44  |       | 0.28  | .99 | .0084 | 2.7 |
| dieBasis              | 13   |       |       | 0.97  |       | .81 | .1906 | 1.1 |
| UNABHÄNGIGE           | 34   | 0.23  |       | 0.80  |       | .86 | .1449 | 1.2 |
| Die Grauen            | 9    | 0.24  | 0.21  | 0.79  |       | .73 | .2674 | 1.3 |
| MENSCHLICHE WELT      | 23   | -0.47 | 0.25  | 0.77  |       | .48 | .5152 | 1.9 |
| III. Weg              | 19   |       | -0.22 | 0.77  |       | .88 | .1179 | 1.2 |
| NPD                   | 25   |       | -0.28 | 0.75  |       | .84 | .1613 | 1.3 |
| BÜRGERBEWEGUNG        | 5    | 0.35  |       | 0.43  | -0.25 | .63 | .3745 | 2.8 |
| BüSo                  | 6    |       | -0.27 | 0.28  |       | .29 | .7117 | 2.2 |

|                    | ML1   | ML4  | ML2  | ML3  |
|--------------------|-------|------|------|------|
| SS Ladungen        | 12.03 | 8.94 | 5.59 | 1.44 |
| Anteilige Var.     | .33   | .25  | .16  | .04  |
| Kumulative Var.    | .33   | .58  | .74  | .78  |
| Anteil Erklärt     | .43   | .32  | .20  | .05  |
| Kumulativer Anteil | .43   | .75  | .95  | 1.00 |

Mit folgenden Faktorkorrelationen

|     | ML1  | ML4  | ML2  | ML3  |
|-----|------|------|------|------|
| ML1 | 1.00 | -.64 | .55  | -.63 |
| ML4 | -.64 | 1.00 | -.37 | .44  |
| ML2 | .55  | -.37 | 1.00 | -.46 |
| ML3 | -.63 | .44  | -.46 | 1.00 |

## Erste Stichprobe – 2 Faktoren

Standardisierte Ladungsmatrix basierend auf der Korrelationsmatrix

|                       | item | ML1   | ML2   | h2   | u2   | com |
|-----------------------|------|-------|-------|------|------|-----|
| DKP                   | 14   | 0.97  |       | .891 | .109 | 1.0 |
| SGP                   | 29   | 0.94  |       | .865 | .135 | 1.0 |
| Tierschutzallianz     | 32   | 0.93  | 0.39  | .616 | .384 | 1.3 |
| DiB                   | 8    | 0.93  |       | .961 | .039 | 1.0 |
| du.                   | 15   | 0.91  |       | .964 | .036 | 1.0 |
| Die PARTEI            | 12   | 0.90  |       | .924 | .076 | 1.0 |
| V-Partei <sup>3</sup> | 35   | 0.88  |       | .926 | .074 | 1.0 |
| DIE LINKE             | 11   | 0.88  |       | .975 | .025 | 1.1 |
| MLPD                  | 24   | 0.87  |       | .863 | .137 | 1.0 |
| Tierschutzpartei      | 33   | 0.85  | -0.21 | .964 | .036 | 1.1 |
| PIRATEN               | 28   | 0.84  |       | .614 | .386 | 1.0 |
| ÖDP                   | 26   | 0.82  |       | .856 | .144 | 1.1 |
| CDU / CSU             | 7    | -0.81 |       | .795 | .205 | 1.1 |
| SSW                   | 31   | 0.78  |       | .690 | .310 | 1.0 |
| Volt                  | 36   | 0.78  | -0.25 | .878 | .122 | 1.2 |
| GRÜNE                 | 18   | 0.78  | -0.30 | .947 | .053 | 1.3 |
| LfK                   | 20   | 0.71  |       | .640 | .360 | 1.1 |
| AfD                   | 1    | -0.66 | 0.43  | .940 | .060 | 1.7 |
| SPD                   | 30   | 0.64  |       | .513 | .487 | 1.1 |
| BP                    | 2    | -0.60 | 0.44  | .853 | .147 | 1.8 |
| Bündnis C             | 3    | -0.57 | 0.39  | .729 | .271 | 1.8 |
| LKR                   | 22   | -0.57 | 0.47  | .843 | .157 | 1.9 |
| FDP                   | 16   | -0.56 |       | .406 | .594 | 1.1 |
| PdF                   | 27   | 0.52  | 0.31  | .190 | .810 | 1.6 |
| Die Humanisten        | 10   | 0.50  |       | .316 | .684 | 1.1 |
| FREIE WÄHLER          | 17   | -0.45 | 0.45  | .630 | .370 | 2.0 |
| BüSo                  | 6    | -0.32 | 0.26  | .262 | .738 | 1.9 |
| UNABHÄNGIGE           | 34   |       | 0.96  | .875 | .125 | 1.0 |

|                  |    |       |      |      |      |     |
|------------------|----|-------|------|------|------|-----|
| Die Grauen       | 9  |       | 0.95 | .755 | .245 | 1.1 |
| dieBasis         | 13 | 0.21  | 0.94 | .716 | .284 | 1.1 |
| III. Weg         | 19 |       | 0.81 | .839 | .161 | 1.1 |
| NPD              | 25 |       | 0.77 | .776 | .224 | 1.1 |
| MENSCHLICHE WELT | 23 | 0.66  | 0.71 | .422 | .578 | 2.0 |
| BÜRGERBEWEGUNG   | 5  |       | 0.66 | .586 | .414 | 1.1 |
| BÜNDNIS21        | 4  | -0.38 | 0.49 | .597 | .403 | 1.9 |
| LIEBE            | 21 |       | 0.21 | .076 | .924 | 1.4 |

|                    |       |      |     |
|--------------------|-------|------|-----|
|                    |       | ML1  | ML2 |
| SS Ladungen        | 17.58 | 8.12 |     |
| Anteilige Var.     | .49   | .23  |     |
| Kumulative Var.    | .49   | .71  |     |
| Anteil Erklärt     | .68   | .32  |     |
| Kumulativer Anteil | .68   | 1.00 |     |

Mit folgenden Faktorkorrelationen

|     |      |      |
|-----|------|------|
|     | ML1  | ML2  |
| ML1 | 1.00 | -.55 |
| ML2 | -.55 | 1.00 |

## Erste Stichprobe - 1 Faktor

Standardisierte Ladungsmatrix basierend auf der Korrelationsmatrix

|                       | item | ML1   | h2   | u2   | com |
|-----------------------|------|-------|------|------|-----|
| DIE LINKE             | 11   | 0.99  | .972 | .028 | 1   |
| Tierschutzpartei      | 33   | 0.98  | .966 | .034 | 1   |
| du.                   | 15   | 0.98  | .959 | .041 | 1   |
| DiB                   | 8    | 0.98  | .951 | .049 | 1   |
| GRÜNE                 | 18   | 0.97  | .943 | .057 | 1   |
| V-Partei <sup>3</sup> | 35   | 0.96  | .925 | .075 | 1   |
| Die PARTEI            | 12   | 0.96  | .919 | .081 | 1   |
| AfD                   | 1    | -0.95 | .898 | .102 | 1   |
| Volt                  | 36   | 0.93  | .874 | .126 | 1   |
| ÖDP                   | 26   | 0.93  | .859 | .141 | 1   |
| MLPD                  | 24   | 0.93  | .856 | .144 | 1   |
| DKP                   | 14   | 0.92  | .845 | .155 | 1   |
| SGP                   | 29   | 0.91  | .828 | .172 | 1   |
| BP                    | 2    | -0.90 | .801 | .199 | 1   |
| CDU / CSU             | 7    | -0.89 | .795 | .205 | 1   |
| LKR                   | 22   | -0.88 | .783 | .217 | 1   |
| Bündnis C             | 3    | -0.83 | .693 | .307 | 1   |
| SSW                   | 31   | 0.83  | .686 | .314 | 1   |
| LfK                   | 20   | 0.80  | .637 | .363 | 1   |
| FREIE WÄHLER          | 17   | -0.75 | .570 | .430 | 1   |
| PIRATEN               | 28   | 0.75  | .562 | .438 | 1   |
| III. Weg              | 19   | -0.72 | .523 | .477 | 1   |



|                   |    |       |      |      |   |
|-------------------|----|-------|------|------|---|
| BÜNDNIS21         | 4  | -0.72 | .514 | .486 | 1 |
| SPD               | 30 | 0.72  | .513 | .487 | 1 |
| NPD               | 25 | -0.71 | .498 | .502 | 1 |
| Tierschutzallianz | 32 | 0.65  | .417 | .583 | 1 |
| FDP               | 16 | -0.64 | .406 | .594 | 1 |
| BÜRGERBEWEGUNG    | 5  | -0.62 | .385 | .615 | 1 |
| UNABHÄNGIGE       | 34 | -0.61 | .377 | .623 | 1 |
| Die Humanisten    | 10 | 0.56  | .313 | .687 | 1 |
| BüSo              | 6  | -0.50 | .245 | .755 | 1 |
| Die Grauen        | 9  | -0.49 | .237 | .763 | 1 |
| dieBasis          | 13 | -0.44 | .193 | .807 | 1 |
| PdF               | 27 | 0.30  | .090 | .910 | 1 |
| LIEBE             | 21 | -0.24 | .057 | .943 | 1 |
| MENSCHLICHE WELT  | 23 |       | .028 | .972 | 1 |

ML1

SS Ladungen 22.12  
 Anteilige Var. .61

# Explorative Faktoranalyse - Zweite Stichprobe - 8 Faktoren

Standardisierte Ladungsmatrix basierend auf der Korrelationsmatrix

|                       | item | ML1   | ML2  | ML4   | ML5   | ML8   | ML7   | ML6  | ML3  | h2  | u2    | com |
|-----------------------|------|-------|------|-------|-------|-------|-------|------|------|-----|-------|-----|
| SSW                   | 30   | 1.20  |      |       |       |       |       | 0.23 |      | .97 | .0297 | 1.2 |
| ÖDP                   | 25   | 1.08  |      |       | 0.22  |       |       |      |      | .94 | .0593 | 1.1 |
| GRÜNE                 | 18   | 1.03  |      |       |       |       |       |      |      | .98 | .0176 | 1.1 |
| du.                   | 15   | 1.00  |      |       |       |       |       |      |      | .98 | .0201 | 1.1 |
| Volt                  | 36   | 0.99  |      |       |       |       |       |      |      | .95 | .0535 | 1.2 |
| DiB                   | 8    | 0.95  |      |       |       |       |       |      |      | .98 | .0179 | 1.0 |
| SPD                   | 29   | 0.92  |      |       |       |       |       |      |      | .81 | .1872 | 1.3 |
| DIE LINKE             | 11   | 0.92  |      |       |       |       |       |      |      | .99 | .0052 | 1.1 |
| Tierschutzpartei      | 33   | 0.92  |      |       |       |       |       |      |      | .99 | .0051 | 1.1 |
| Die PARTEI            | 12   | 0.90  |      |       |       | -0.21 |       |      |      | .97 | .0298 | 1.2 |
| LfK                   | 20   | 0.88  |      |       |       |       |       |      | 0.37 | .80 | .2030 | 1.4 |
| PIRATEN               | 27   | 0.85  |      |       |       |       |       |      |      | .91 | .0941 | 1.4 |
| SGP                   | 28   | 0.82  |      |       | -0.26 | 0.25  |       |      |      | .97 | .0288 | 1.4 |
| MLPD                  | 23   | 0.82  |      | -0.32 |       |       | 0.24  |      | 0.21 | 1.0 | .0050 | 1.7 |
| V-Partei <sup>3</sup> | 35   | 0.81  |      |       |       |       | 0.22  |      |      | 1.0 | .0049 | 1.4 |
| Tierschutzallianz     | 32   | 0.78  | 0.34 |       | -0.32 |       |       | 0.23 |      | .92 | .0754 | 2.1 |
| DKP                   | 14   | 0.75  |      | -0.23 | -0.20 |       |       |      |      | .97 | .0303 | 1.5 |
| Die Humanisten        | 10   | 0.62  |      |       |       |       | 0.30  |      |      | .75 | .2456 | 1.9 |
| PdF                   | 26   | 0.60  |      | 0.37  |       |       | 0.50  |      |      | .72 | .2787 | 2.8 |
| AfD                   | 1    | -0.51 | 0.24 |       | 0.26  |       |       |      |      | .96 | .0400 | 2.3 |
| BÜNDNIS21             | 4    | -0.35 |      | 0.22  |       | 0.29  |       |      |      | .75 | .2544 | 3.8 |
| Die Grauen            | 9    |       | 1.01 |       |       | -0.26 |       |      |      | .86 | .1387 | 1.3 |
| UNABHÄNGIGE           | 34   |       | 0.92 |       |       |       |       |      |      | .87 | .1330 | 1.2 |
| dieBasis              | 13   |       | 0.84 | -0.30 | 0.23  |       |       |      |      | .83 | .1651 | 1.6 |
| III. Weg              | 19   |       | 0.77 |       |       |       | -0.25 |      |      | .94 | .0585 | 1.4 |
| NPD                   | 24   |       | 0.74 |       |       |       | -0.21 |      |      | .93 | .0678 | 1.5 |
| MENSCHLICHE WELT      | 22   | 0.36  | 0.69 | -0.21 |       |       |       |      |      | .67 | .3294 | 2.1 |
| FDP                   | 16   |       |      | 0.95  |       |       |       |      |      | .77 | .2307 | 1.1 |
| FREIE WÄHLER          | 17   |       |      | 0.85  |       |       |       |      |      | .83 | .1741 | 1.1 |
| Team Todenhöfer       | 31   | 0.32  |      | 0.57  | -0.33 | 0.42  |       |      |      | .82 | .1829 | 3.5 |
| CDU / CSU             | 7    | -0.30 |      | 0.55  |       |       |       |      | 0.29 | .89 | .1111 | 2.7 |
| LKR                   | 21   | -0.36 | 0.22 | 0.40  |       |       |       |      |      | .85 | .1467 | 3.1 |
| Bündnis C             | 3    |       |      | 0.25  | 0.50  | 0.25  |       |      |      | .82 | .1795 | 2.2 |
| BP                    | 2    | -0.32 | 0.32 |       | 0.48  |       |       |      |      | .90 | .0955 | 2.8 |
| BüSo                  | 6    |       |      |       |       | 0.76  |       |      |      | .71 | .2895 | 1.1 |
| BÜRGERBEWEGUNG        | 5    |       | 0.57 |       |       |       |       | 0.58 |      | .70 | .2979 | 2.1 |

|                    | ML1   | ML2  | ML4  | ML5  | ML8  | ML7  | ML6  | ML3  |
|--------------------|-------|------|------|------|------|------|------|------|
| SS Ladungen        | 17.39 | 5.21 | 3.43 | 2.01 | 1.48 | 1.24 | 0.72 | 0.24 |
| Anteilige Var.     | .48   | .14  | .10  | .06  | .04  | .03  | .02  | .01  |
| Kumulative Var.    | .48   | .63  | .72  | .78  | .82  | .85  | .87  | .88  |
| Anteil Erklärt     | .55   | .16  | .11  | .06  | .05  | .04  | .02  | .01  |
| Kumulativer Anteil | .55   | .71  | .82  | .88  | .93  | .97  | .99  | 1.00 |

Mit folgenden Faktorkorrelationen

|     | ML1  | ML2  | ML4  | ML5  | ML8  | ML7 | ML6 | ML3  |
|-----|------|------|------|------|------|-----|-----|------|
| ML1 | 1.00 | -.31 | -.52 | -.72 | -.34 | .39 | .05 | -.35 |

|     |      |      |      |      |      |      |      |      |
|-----|------|------|------|------|------|------|------|------|
| ML2 | -.31 | 1.00 | .42  | .29  | .60  | .13  | .09  | .15  |
| ML4 | -.52 | .42  | 1.00 | .43  | .48  | .26  | .36  | -.01 |
| ML5 | -.72 | .29  | .43  | 1.00 | .26  | -.35 | .07  | .26  |
| ML8 | -.34 | .60  | .48  | .26  | 1.00 | .34  | .01  | .05  |
| ML7 | .39  | .13  | .26  | -.35 | .34  | 1.00 | .30  | -.10 |
| ML6 | .05  | .09  | .36  | .07  | .01  | .30  | 1.00 | .04  |
| ML3 | -.35 | .15  | -.01 | .26  | .05  | -.10 | .04  | 1.00 |

## Zweite Stichprobe – 7 Faktoren

Standardisierte Ladungsmatrix basierend auf der Korrelationsmatrix

|                       | item | ML1   | ML2  | ML3   | ML6   | ML4   | ML5   | ML7   | h2  | u2    | com |
|-----------------------|------|-------|------|-------|-------|-------|-------|-------|-----|-------|-----|
| SPD                   | 29   | 1.00  |      |       |       |       |       |       | .84 | .1616 | 1.2 |
| du.                   | 15   | 1.00  |      |       |       |       |       |       | .98 | .0197 | 1.1 |
| GRÜNE                 | 18   | 1.00  |      |       |       |       |       |       | .98 | .0236 | 1.1 |
| Die PARTEI            | 12   | 0.99  |      |       |       |       |       |       | .97 | .0308 | 1.1 |
| Tierschutzpartei      | 33   | 0.99  |      |       |       |       |       |       | .99 | .0075 | 1.1 |
| ÖDP                   | 25   | 0.98  |      |       |       |       |       |       | .91 | .0904 | 1.1 |
| MLPD                  | 23   | 0.98  |      | -0.23 |       |       |       |       | .96 | .0430 | 1.3 |
| LfK                   | 20   | 0.96  |      |       |       |       |       | 0.34  | .77 | .2314 | 1.3 |
| DiB                   | 8    | 0.93  |      |       |       |       |       |       | .98 | .0205 | 1.0 |
| DIE LINKE             | 11   | 0.93  |      |       |       |       |       |       | .00 | .0048 | 1.1 |
| SSW                   | 30   | 0.93  |      |       |       |       |       |       | .86 | .1366 | 1.1 |
| V-Partei <sup>3</sup> | 35   | 0.92  |      |       |       |       |       |       | .99 | .0109 | 1.1 |
| PdF                   | 26   | 0.87  |      | 0.49  |       |       |       |       | .69 | .3068 | 1.7 |
| Volt                  | 36   | 0.86  |      |       |       |       |       |       | .93 | .0696 | 1.1 |
| DKP                   | 14   | 0.85  |      |       |       |       |       |       | .96 | .0446 | 1.3 |
| SGP                   | 28   | 0.84  |      |       | -0.22 |       |       |       | .96 | .0448 | 1.3 |
| Die Humanisten        | 10   | 0.80  |      | 0.32  |       |       |       |       | .74 | .2622 | 1.4 |
| PIRATEN               | 27   | 0.79  |      |       |       |       |       | -0.30 | .92 | .0774 | 1.5 |
| Tierschutzallianz     | 32   | 0.75  | 0.38 |       | -0.33 |       | 0.24  |       | .93 | .0736 | 2.2 |
| AfD                   | 1    | -0.49 | 0.23 | 0.22  | 0.27  |       |       |       | .96 | .0354 | 2.6 |
| BÜNDNIS21             | 4    | -0.34 |      | 0.27  |       | 0.33  |       |       | .74 | .2583 | 3.6 |
| Die Grauen            | 9    |       | 1.02 | 0.21  |       | -0.22 |       |       | .86 | .1389 | 1.4 |
| UNABHÄNGIGE           | 34   |       | 0.92 |       |       |       | 0.22  |       | .86 | .1356 | 1.1 |
| dieBasis              | 13   |       | 0.84 | -0.31 | 0.20  | 0.27  |       |       | .87 | .1282 | 1.8 |
| III. Weg              | 19   | -0.26 | 0.79 |       |       |       |       |       | .94 | .0621 | 1.3 |
| NPD                   | 24   |       | 0.74 |       |       |       | -0.21 |       | .94 | .0602 | 1.4 |
| BÜRGERBEWEGUNG        | 5    |       | 0.65 |       |       |       | 0.59  |       | .71 | .2866 | 2.1 |
| MENSCHLICHE WELT      | 22   | 0.49  | 0.62 | -0.26 |       | 0.36  |       |       | .69 | .3076 | 3.0 |
| FDP                   | 16   |       |      | 0.96  |       |       |       |       | .77 | .2294 | 1.1 |
| FREIE WÄHLER          | 17   |       |      | 0.88  |       |       |       |       | .84 | .1636 | 1.1 |
| CDU / CSU             | 7    | -0.28 |      | 0.58  |       |       |       | 0.23  | .87 | .1286 | 2.5 |
| Team Todenhöfer       | 31   | 0.27  |      | 0.54  | -0.30 | 0.52  |       |       | .87 | .1333 | 3.3 |
| LKR                   | 21   | -0.31 | 0.23 | 0.50  |       |       |       |       | .87 | .1307 | 2.6 |
| Bündnis C             | 3    |       |      | 0.25  | 0.52  |       |       |       | .82 | .1759 | 2.0 |
| BP                    | 2    | -0.29 | 0.32 |       | 0.46  |       |       |       | .91 | .0909 | 3.0 |
| BüSo                  | 6    | -0.36 |      |       |       | 0.75  |       |       | .75 | .2537 | 1.5 |

|                    | ML1   | ML2  | ML3  | ML6  | ML4  | ML5 | ML7  |
|--------------------|-------|------|------|------|------|-----|------|
| SS Ladungen        | 17.95 | 5.27 | 3.77 | 1.97 | 1.60 | .66 | .40  |
| Anteilige Var.     | .50   | .15  | .10  | .05  | .04  | .02 | .01  |
| Kumulative Var.    | .50   | .65  | .75  | .80  | .85  | .87 | .88  |
| Anteil Erklärt     | .57   | .17  | .12  | .06  | .05  | .02 | .01  |
| Kumulativer Anteil | .57   | .73  | .85  | .92  | .97  | .99 | 1.00 |

Mit folgenden Faktorkorrelationen

|     | ML1  | ML2  | ML3  | ML6  | ML4  | ML5  | ML7  |
|-----|------|------|------|------|------|------|------|
| ML1 | 1.00 | -.33 | -.38 | -.68 | -.10 | .24  | -.52 |
| ML2 | -.33 | 1.00 | .40  | .39  | .51  | -.06 | .27  |
| ML3 | -.38 | .40  | 1.00 | .39  | .49  | .29  | .03  |
| ML6 | -.68 | .39  | .39  | 1.00 | .23  | -.01 | .42  |
| ML4 | -.10 | .51  | .49  | .23  | 1.00 | .07  | .05  |
| ML5 | .24  | -.06 | .29  | -.01 | .07  | 1.00 | -.09 |
| ML7 | -.52 | .27  | .03  | .42  | .05  | -.09 | 1.00 |

## Zweite Stichprobe - 6 Faktoren

Standardisierte Ladungsmatrix basierend auf der Korrelationsmatrix

|                       | item | ML1   | ML2  | ML4   | ML6   | ML5   | ML3  | h2  | u2    | com |
|-----------------------|------|-------|------|-------|-------|-------|------|-----|-------|-----|
| V-Partei <sup>3</sup> | 35   | 1.01  |      |       |       |       |      | .98 | .0219 | 1.1 |
| Die PARTEI            | 12   | 0.99  |      |       |       |       |      | .97 | .0292 | 1.1 |
| Tierschutzpartei      | 33   | 0.99  |      |       |       |       |      | .99 | .0074 | 1.1 |
| PIRATEN               | 27   | 0.98  |      | 0.32  |       |       |      | .89 | .1071 | 1.3 |
| ÖDP                   | 25   | 0.98  |      |       |       |       |      | .90 | .0976 | 1.1 |
| SSW                   | 30   | 0.96  |      |       |       |       |      | .85 | .1464 | 1.1 |
| GRÜNE                 | 18   | 0.93  |      |       |       |       |      | .97 | .0266 | 1.1 |
| SPD                   | 29   | 0.93  |      |       |       | -0.20 | 0.20 | .82 | .1774 | 1.3 |
| MLPD                  | 23   | 0.91  |      | -0.35 |       |       |      | 1.0 | .0050 | 1.5 |
| DiB                   | 8    | 0.91  |      |       |       |       |      | .98 | .0188 | 1.1 |
| du.                   | 15   | 0.90  |      |       |       |       |      | .97 | .0266 | 1.0 |
| PdF                   | 26   | 0.90  |      | 0.45  |       |       |      | .71 | .2923 | 1.7 |
| DIE LINKE             | 11   | 0.84  |      |       |       |       |      | .99 | .0114 | 1.1 |
| Volt                  | 36   | 0.82  |      |       |       |       |      | .93 | .0676 | 1.1 |
| DKP                   | 14   | 0.82  |      | -0.20 |       |       |      | .96 | .0375 | 1.4 |
| Die Humanisten        | 10   | 0.81  |      | 0.28  |       |       |      | .75 | .2519 | 1.4 |
| SGP                   | 28   | 0.80  |      |       | -0.26 | 0.20  |      | .96 | .0422 | 1.4 |
| Tierschutzallianz     | 32   | 0.77  | 0.37 |       | -0.33 |       | 0.23 | .93 | .0738 | 2.1 |
| LfK                   | 20   | 0.75  |      | -0.23 |       |       | 0.21 | .77 | .2260 | 1.5 |
| AfD                   | 1    | -0.53 | 0.24 |       | 0.26  |       |      | .96 | .0387 | 2.3 |
| LKR                   | 21   | -0.46 | 0.22 | 0.31  |       |       |      | .84 | .1636 | 2.8 |
| Die Grauen            | 9    |       | 0.95 |       |       |       |      | .82 | .1753 | 1.2 |
| UNABHÄNGIGE           | 34   |       | 0.89 |       |       |       |      | .86 | .1368 | 1.1 |
| dieBasis              | 13   |       | 0.81 |       |       |       |      | .81 | .1874 | 1.4 |

|                  |    |       |      |       |       |      |     |       |     |
|------------------|----|-------|------|-------|-------|------|-----|-------|-----|
| III. Weg         | 19 | -0.38 | 0.77 |       |       |      | .93 | .0728 | 1.5 |
| NPD              | 24 | -0.36 | 0.70 |       |       |      | .90 | .1050 | 1.7 |
| BÜRGERBEWEGUNG   | 5  |       | 0.65 |       | -0.21 | 0.42 | .64 | .3609 | 2.0 |
| MENSCHLICHE WELT | 22 | 0.51  | 0.61 | -0.21 | 0.34  |      | .67 | .3297 | 2.8 |
| FDP              | 16 |       |      | 0.85  |       |      | .74 | .2630 | 1.1 |
| FREIE WÄHLER     | 17 |       |      | 0.77  |       |      | .81 | .1910 | 1.1 |
| Team Todenhöfer  | 31 | 0.40  |      | 0.70  | -0.29 | 0.49 | .85 | .1521 | 2.9 |
| CDU / CSU        | 7  | -0.40 |      | 0.41  |       | 0.36 | .85 | .1493 | 3.5 |
| BP               | 2  | -0.33 | 0.32 |       | 0.45  |      | .90 | .0977 | 3.1 |
| Bündnis C        | 3  |       |      | 0.27  | 0.44  |      | .78 | .2185 | 2.6 |
| BüSo             | 6  | -0.34 |      |       |       | 0.64 | .67 | .3347 | 1.6 |
| BÜNDNIS21        | 4  | -0.35 |      | 0.21  |       | 0.38 | .75 | .2471 | 3.2 |

|                    |       |      |      |      |      |      |     |  |  |
|--------------------|-------|------|------|------|------|------|-----|--|--|
|                    |       | ML1  | ML2  | ML4  | ML6  | ML5  | ML3 |  |  |
| SS Ladungen        | 18.09 | 5.13 | 3.42 | 1.96 | 1.66 | .85  |     |  |  |
| Anteilige Var.     | .50   | .14  | .10  | .05  | .05  | .02  |     |  |  |
| Kumulative Var.    | .50   | .64  | .74  | .79  | .84  | .86  |     |  |  |
| Anteil Erklärt     | .58   | .16  | .11  | .06  | .05  | .03  |     |  |  |
| Kumulativer Anteil | .58   | .75  | .86  | .92  | .97  | 1.00 |     |  |  |

Mit folgenden Faktorkorrelationen

|     |      |      |      |      |      |      |
|-----|------|------|------|------|------|------|
|     | ML1  | ML2  | ML4  | ML6  | ML5  | ML3  |
| ML1 | 1.00 | -.29 | -.32 | -.65 | -.17 | -.06 |
| ML2 | -.29 | 1.00 | .38  | .38  | .49  | .14  |
| ML4 | -.32 | .38  | 1.00 | .41  | .40  | .30  |
| ML6 | -.65 | .38  | .41  | 1.00 | .34  | .24  |
| ML5 | -.17 | .49  | .40  | .34  | 1.00 | .22  |
| ML3 | -.06 | .14  | .30  | .24  | .22  | 1.00 |

## Zweite Stichprobe - 5 Faktoren

Standardisierte Ladungsmatrix basierend auf der Korrelationsmatrix

|                       |      |      |      |       |      |       |     |       |     |
|-----------------------|------|------|------|-------|------|-------|-----|-------|-----|
|                       | item | ML1  | ML2  | ML4   | ML3  | ML5   | h2  | u2    | com |
| SSW                   | 30   | 0.97 |      |       |      |       | .85 | .1493 | 1.1 |
| PIRATEN               | 27   | 0.97 |      | 0.32  |      |       | .88 | .1167 | 1.4 |
| V-Partei <sup>3</sup> | 35   | 0.97 |      |       |      |       | .97 | .0272 | 1.1 |
| SPD                   | 29   | 0.95 |      |       | 0.28 |       | .79 | .2056 | 1.2 |
| Die PARTEI            | 12   | 0.95 |      |       |      | -0.22 | .97 | .0305 | 1.1 |
| Tierschutzpartei      | 33   | 0.94 |      |       |      |       | .99 | .0138 | 1.0 |
| ÖDP                   | 25   | 0.93 |      |       |      |       | .90 | .0990 | 1.1 |
| MLPD                  | 23   | 0.92 |      | -0.36 |      | 0.20  | 1.0 | .0049 | 1.5 |
| DiB                   | 8    | 0.92 |      |       |      |       | .98 | .0192 | 1.1 |
| GRÜNE                 | 18   | 0.91 |      |       |      |       | .97 | .0259 | 1.1 |
| Tierschutzallianz     | 32   | 0.90 | 0.26 |       |      |       | .82 | .1827 | 1.2 |
| du.                   | 15   | 0.89 |      |       |      |       | .97 | .0268 | 1.0 |

|                  |    |       |      |       |       |      |       |       |     |
|------------------|----|-------|------|-------|-------|------|-------|-------|-----|
| PdF              | 26 | 0.87  |      | 0.47  |       | .70  | .2955 | 1.7   |     |
| Die Humanisten   | 10 | 0.87  |      | 0.31  |       | .74  | .2620 | 1.4   |     |
| DIE LINKE        | 11 | 0.86  |      |       |       | .99  | .0113 | 1.1   |     |
| Volt             | 36 | 0.86  |      |       |       | .93  | .0717 | 1.1   |     |
| DKP              | 14 | 0.85  |      |       |       | .97  | .0349 | 1.3   |     |
| SGP              | 28 | 0.83  |      | -0.29 |       | .96  | .0378 | 1.4   |     |
| LfK              | 20 | 0.81  |      | -0.23 | 0.23  | .76  | .2394 | 1.4   |     |
| AfD              | 1  | -0.57 | 0.30 |       | 0.23  | .96  | .0427 | 2.1   |     |
| LKR              | 21 | -0.48 | 0.25 | 0.34  |       | .84  | .1646 | 2.6   |     |
| BÜNDNIS21        | 4  | -0.40 |      | 0.23  | 0.29  | .72  | .2822 | 3.2   |     |
| dieBasis         | 13 |       | 0.90 |       |       | .81  | .1923 | 1.2   |     |
| Die Grauen       | 9  | 0.24  | 0.89 |       |       | .76  | .2410 | 1.2   |     |
| UNABHÄNGIGE      | 34 |       | 0.86 |       |       | .82  | .1817 | 1.0   |     |
| III. Weg         | 19 | -0.41 | 0.81 |       |       | .93  | .0714 | 1.5   |     |
| NPD              | 24 | -0.40 | 0.77 |       |       | .89  | .1100 | 1.5   |     |
| MENSCHLICHE WELT | 22 | 0.50  | 0.68 | -0.21 | 0.29  | .66  | .3421 | 2.5   |     |
| BÜRGERBEWEGUNG   | 5  |       | 0.57 |       | 0.28  | .48  | .5188 | 1.7   |     |
| FDP              | 16 |       |      | 0.89  |       | .75  | .2491 | 1.1   |     |
| FREIE WÄHLER     | 17 |       |      | 0.81  |       | .81  | .1923 | 1.1   |     |
| Team Todenhöfer  | 31 | 0.41  |      | 0.75  | -0.36 | 0.38 | .79   | .2054 | 2.6 |
| CDU / CSU        | 7  | -0.35 |      | 0.42  | 0.37  | .82  | .1763 | 3.3   |     |
| BP               | 2  | -0.38 | 0.40 |       | 0.43  | .90  | .0972 | 3.2   |     |
| Bündnis C        | 3  | -0.27 | 0.27 | 0.26  | 0.37  | .77  | .2320 | 3.6   |     |
| BüSo             | 6  | -0.38 |      |       |       | 0.52 | .58   | .4153 | 2.1 |

|                    |       |      |      |      |      |     |  |  |
|--------------------|-------|------|------|------|------|-----|--|--|
|                    |       | ML1  | ML2  | ML4  | ML3  | ML5 |  |  |
| SS Ladungen        | 18.35 | 5.38 | 3.58 | 1.78 | 1.34 |     |  |  |
| Anteilige Var.     | .51   | .15  | .10  | .05  | .04  |     |  |  |
| Kumulative Var.    | .51   | .66  | .76  | .81  | .85  |     |  |  |
| Anteil Erklärt     | .60   | .18  | .12  | .06  | .04  |     |  |  |
| Kumulativer Anteil | .60   | .78  | .90  | .96  | 1.00 |     |  |  |

Mit folgenden Faktorkorrelationen

|     |      |      |      |      |      |
|-----|------|------|------|------|------|
|     | ML1  | ML2  | ML4  | ML3  | ML5  |
| ML1 | 1.00 | -.32 | -.33 | -.50 | -.12 |
| ML2 | -.32 | 1.00 | .43  | .33  | .47  |
| ML4 | -.33 | .43  | 1.00 | .50  | .44  |
| ML3 | -.50 | .33  | .50  | 1.00 | .39  |
| ML5 | -.12 | .47  | .44  | .39  | 1.00 |

## Zweite Stichprobe - 4 Faktoren

Standardisierte Ladungsmatrix basierend auf der Korrelationsmatrix

|         |      |      |     |      |     |     |      |     |
|---------|------|------|-----|------|-----|-----|------|-----|
|         | item | ML1  | ML2 | ML3  | ML4 | h2  | u2   | com |
| PIRATEN | 27   | 1.06 |     | 0.26 |     | .87 | .128 | 1.2 |

|                       |    |       |       |      |      |     |      |     |
|-----------------------|----|-------|-------|------|------|-----|------|-----|
| V-Partei <sup>3</sup> | 35 | 1.02  |       |      |      | .97 | .027 | 1.0 |
| Die PARTEI            | 12 | 1.00  |       |      |      | .97 | .032 | 1.1 |
| SSW                   | 30 | 0.99  |       |      |      | .85 | .152 | 1.1 |
| Tierschutzpartei      | 33 | 0.98  |       |      |      | .99 | .014 | 1.0 |
| DiB                   | 8  | 0.97  |       |      |      | .98 | .020 | 1.0 |
| Tierschutzallianz     | 32 | 0.96  | 0.27  |      |      | .82 | .181 | 1.2 |
| ÖDP                   | 25 | 0.95  |       |      |      | .90 | .101 | 1.1 |
| GRÜNE                 | 18 | 0.94  |       |      |      | .97 | .026 | 1.1 |
| du.                   | 15 | 0.94  |       |      |      | .97 | .026 | 1.0 |
| Volt                  | 36 | 0.92  |       |      |      | .93 | .074 | 1.0 |
| SPD                   | 29 | 0.90  |       |      |      | .75 | .251 | 1.1 |
| SGP                   | 28 | 0.90  |       | 0.24 |      | .96 | .036 | 1.2 |
| DIE LINKE             | 11 | 0.90  |       |      |      | .99 | .011 | 1.1 |
| DKP                   | 14 | 0.89  | -0.22 |      |      | .96 | .037 | 1.2 |
| Die Humanisten        | 10 | 0.88  | 0.39  |      |      | .73 | .269 | 1.5 |
| PdF                   | 26 | 0.85  | 0.60  |      |      | .68 | .316 | 1.8 |
| MLPD                  | 23 | 0.85  |       |      |      | .90 | .104 | 1.1 |
| LfK                   | 20 | 0.76  |       |      |      | .70 | .302 | 1.1 |
| AfD                   | 1  | -0.64 | 0.33  | 0.24 |      | .95 | .053 | 1.8 |
| LKR                   | 21 | -0.50 | 0.25  | 0.36 |      | .83 | .166 | 2.6 |
| BP                    | 2  | -0.48 | 0.46  | 0.24 |      | .86 | .136 | 2.7 |
| BÜNDNIS21             | 4  | -0.45 | 0.22  | 0.32 | 0.24 | .71 | .293 | 3.0 |
| dieBasis              | 13 |       | 0.97  |      |      | .80 | .204 | 1.1 |
| Die Grauen            | 9  | 0.31  | 0.92  |      |      | .76 | .244 | 1.2 |
| UNABHÄNGIGE           | 34 |       | 0.90  |      |      | .83 | .173 | 1.0 |
| III. Weg              | 19 | -0.38 | 0.82  |      |      | .91 | .093 | 1.5 |
| NPD                   | 24 | -0.38 | 0.78  |      |      | .87 | .126 | 1.5 |
| MENSCHLICHE WELT      | 22 | 0.49  | 0.74  |      | 0.21 | .64 | .358 | 2.1 |
| BÜRGERBEWEGUNG        | 5  |       | 0.64  |      |      | .47 | .529 | 1.2 |
| FDP                   | 16 |       | -0.21 | 0.91 |      | .74 | .262 | 1.1 |
| FREIE WÄHLER          | 17 |       |       | 0.81 |      | .79 | .208 | 1.1 |
| Team Todenhöfer       | 31 | 0.50  |       | 0.69 | 0.46 | .76 | .243 | 2.7 |
| CDU / CSU             | 7  | -0.46 |       | 0.62 |      | .77 | .229 | 1.9 |
| Bündnis C             | 3  | -0.37 | 0.32  | 0.41 |      | .73 | .269 | 2.9 |
| BüSo                  | 6  | -0.42 |       |      | 0.45 | .57 | .431 | 2.4 |

|                    | ML1   | ML2  | ML3  | ML4  |
|--------------------|-------|------|------|------|
| SS Ladungen        | 19.16 | 5.71 | 3.99 | 1.01 |
| Anteilige Var.     | .53   | .16  | .11  | .03  |
| Kumulative Var.    | .53   | .69  | .80  | .83  |
| Anteil Erklärt     | .64   | .19  | .13  | .03  |
| Kumulativer Anteil | .64   | .83  | .97  | 1.00 |

Mit folgenden Faktorkorrelationen

|     | ML1  | ML2  | ML3  | ML4 |
|-----|------|------|------|-----|
| ML1 | 1.00 | -.39 | -.42 | .10 |
| ML2 | -.39 | 1.00 | .50  | .34 |
| ML3 | -.42 | .50  | 1.00 | .13 |

ML4 .10 .34 .13 1.00

## Zweite Stichprobe - 2 Faktoren

Standardisierte Ladungsmatrix basierend auf der Korrelationsmatrix

|                       | item | ML1   | ML2  | h2  | u2   | com |
|-----------------------|------|-------|------|-----|------|-----|
| Tierschutzallianz     | 32   | 0.98  | 0.31 | .82 | .176 | 1.2 |
| DKP                   | 14   | 0.98  |      | .91 | .087 | 1.0 |
| DiB                   | 8    | 0.97  |      | .98 | .021 | 1.0 |
| SGP                   | 28   | 0.97  |      | .90 | .099 | 1.0 |
| V-Partei <sup>3</sup> | 35   | 0.97  |      | .96 | .041 | 1.0 |
| PIRATEN               | 27   | 0.96  | 0.22 | .81 | .189 | 1.1 |
| Die PARTEI            | 12   | 0.96  |      | .95 | .048 | 1.0 |
| du.                   | 15   | 0.95  |      | .97 | .028 | 1.0 |
| Tierschutzpartei      | 33   | 0.95  |      | .98 | .020 | 1.0 |
| DIE LINKE             | 11   | 0.94  |      | .98 | .021 | 1.0 |
| SSW                   | 30   | 0.93  |      | .83 | .171 | 1.0 |
| ÖDP                   | 25   | 0.93  |      | .89 | .115 | 1.0 |
| MLPD                  | 23   | 0.92  |      | .87 | .125 | 1.0 |
| Volt                  | 36   | 0.91  |      | .92 | .079 | 1.0 |
| GRÜNE                 | 18   | 0.90  |      | .97 | .035 | 1.1 |
| LfK                   | 20   | 0.83  |      | .68 | .322 | 1.0 |
| SPD                   | 29   | 0.82  |      | .71 | .286 | 1.0 |
| Die Humanisten        | 10   | 0.81  |      | .58 | .419 | 1.1 |
| PdF                   | 26   | 0.70  | 0.27 | .42 | .585 | 1.3 |
| AfD                   | 1    | -0.69 | 0.46 | .93 | .068 | 1.7 |
| CDU / CSU             | 7    | -0.60 | 0.29 | .58 | .423 | 1.4 |
| BP                    | 2    | -0.58 | 0.51 | .82 | .183 | 2.0 |
| LKR                   | 21   | -0.54 | 0.52 | .78 | .222 | 2.0 |
| FDP                   | 16   | -0.30 | 0.28 | .23 | .767 | 2.0 |
| Die Grauen            | 9    | 0.32  | 0.94 | .76 | .244 | 1.2 |
| UNABHÄNGIGE           | 34   |       | 0.92 | .82 | .180 | 1.0 |
| dieBasis              | 13   |       | 0.91 | .73 | .273 | 1.1 |
| MENSCHLICHE WELT      | 22   | 0.60  | 0.74 | .57 | .431 | 1.9 |
| III. Weg              | 19   | -0.31 | 0.73 | .81 | .191 | 1.4 |
| BÜRGERBEWEGUNG        | 5    |       | 0.72 | .48 | .516 | 1.0 |
| NPD                   | 24   | -0.33 | 0.71 | .79 | .210 | 1.4 |
| FREIE WÄHLER          | 17   |       | 0.58 | .43 | .568 | 1.2 |
| Team Todenhöfer       | 31   | 0.44  | 0.52 | .29 | .711 | 1.9 |
| BÜNDNIS21             | 4    | -0.46 | 0.51 | .65 | .351 | 2.0 |
| Bündnis C             | 3    | -0.48 | 0.50 | .66 | .339 | 2.0 |
| BüSo                  | 6    | -0.32 | 0.46 | .43 | .570 | 1.8 |

SS Ladungen ML1 ML2  
19.34 7.55



|                    |     |      |
|--------------------|-----|------|
| Anteilige Var.     | .54 | .21  |
| Kumulative Var.    | .54 | .75  |
| Anteil Erklärt     | .72 | .28  |
| Kumulativer Anteil | .72 | 1.00 |

Mit folgenden Faktorkorrelationen

|     |      |      |
|-----|------|------|
|     | ML1  | ML2  |
| ML1 | 1.00 | -.38 |
| ML2 | -.38 | 1.00 |

## Zweite Stichprobe - 1 Faktor

Standardisierte Ladungsmatrix basierend auf der Korrelationsmatrix

|                       | item | ML1   | h2   | u2   | com |
|-----------------------|------|-------|------|------|-----|
| Tierschutzpartei      | 33   | 0.99  | .981 | .019 | 1   |
| DIE LINKE             | 11   | 0.99  | .977 | .023 | 1   |
| DiB                   | 8    | 0.99  | .977 | .023 | 1   |
| du.                   | 15   | 0.99  | .973 | .027 | 1   |
| GRÜNE                 | 18   | 0.98  | .961 | .039 | 1   |
| V-Partei <sup>3</sup> | 35   | 0.98  | .956 | .044 | 1   |
| Die PARTEI            | 12   | 0.98  | .952 | .048 | 1   |
| Volt                  | 36   | 0.96  | .919 | .081 | 1   |
| DKP                   | 14   | 0.94  | .890 | .110 | 1   |
| ÖDP                   | 25   | 0.94  | .885 | .115 | 1   |
| SGP                   | 28   | 0.94  | .881 | .119 | 1   |
| MLPD                  | 23   | 0.93  | .873 | .127 | 1   |
| SSW                   | 30   | 0.90  | .814 | .186 | 1   |
| AfD                   | 1    | -0.90 | .806 | .194 | 1   |
| PIRATEN               | 27   | 0.85  | .729 | .271 | 1   |
| SPD                   | 29   | 0.85  | .715 | .285 | 1   |
| Tierschutzallianz     | 32   | 0.83  | .687 | .313 | 1   |
| LfK                   | 20   | 0.82  | .671 | .329 | 1   |
| BP                    | 2    | -0.81 | .650 | .350 | 1   |
| LKR                   | 21   | -0.78 | .604 | .396 | 1   |
| Die Humanisten        | 10   | 0.73  | .537 | .463 | 1   |
| CDU / CSU             | 7    | -0.73 | .536 | .464 | 1   |
| Bündnis C             | 3    | -0.71 | .498 | .502 | 1   |
| BÜNDNIS21             | 4    | -0.69 | .476 | .524 | 1   |
| NPD                   | 24   | -0.66 | .430 | .570 | 1   |
| III. Weg              | 19   | -0.65 | .419 | .581 | 1   |
| PdF                   | 26   | 0.57  | .326 | .674 | 1   |
| BüSo                  | 6    | -0.54 | .287 | .713 | 1   |
| FREIE WÄHLER          | 17   | -0.43 | .186 | .814 | 1   |
| FDP                   | 16   | -0.43 | .182 | .818 | 1   |
| UNABHÄNGIGE           | 34   | -0.39 | .155 | .845 | 1   |
| BÜRGERBEWEGUNG        | 5    | -0.28 | .076 | .924 | 1   |

|                  |    |       |      |      |   |
|------------------|----|-------|------|------|---|
| MENSCHLICHE WELT | 22 | 0.26  | .066 | .934 | 1 |
| dieBasis         | 13 | -0.24 | .056 | .944 | 1 |
| Team Todenhöfer  | 31 |       | .036 | .964 | 1 |
| Die Grauen       | 9  |       | .014 | .986 | 1 |

ML1

|                |       |
|----------------|-------|
| SS Ladungen    | 21.18 |
| Anteilige Var. | .59   |

# Explorative Faktoranalyse - Dritte Stichprobe - 8 Faktoren

Standardisierte Ladungsmatrix basierend auf der Korrelationsmatrix

|                       | item | ML1   | ML2   | ML5   | ML7  | ML4   | ML3  | ML8  | ML6  | h2  | u2    | com |
|-----------------------|------|-------|-------|-------|------|-------|------|------|------|-----|-------|-----|
| SSW                   | 31   | 1.24  |       |       |      | -0.23 |      | 0.27 |      | .99 | .0147 | 1.2 |
| PIRATEN               | 28   | 1.11  |       | 0.29  |      |       |      |      |      | .91 | .0906 | 1.3 |
| Tierschutzallianz     | 32   | 1.07  | 0.38  |       |      |       |      |      |      | .90 | .1043 | 1.3 |
| SGP                   | 29   | 1.03  |       |       |      |       |      |      |      | .98 | .0180 | 1.1 |
| ÖDP                   | 26   | 0.98  |       |       |      |       |      |      |      | .97 | .0268 | 1.2 |
| Volt                  | 36   | 0.96  |       |       |      |       |      |      |      | .95 | .0524 | 1.1 |
| DiB                   | 8    | 0.95  |       |       |      |       |      |      |      | .99 | .0140 | 1.0 |
| V-Partei <sup>3</sup> | 35   | 0.93  |       |       |      |       |      |      |      | .99 | .0117 | 1.1 |
| DKP                   | 14   | 0.92  |       |       |      |       |      |      |      | .97 | .0283 | 1.1 |
| Die Humanisten        | 10   | 0.90  |       | 0.53  |      |       |      |      |      | .79 | .2094 | 1.8 |
| du.                   | 15   | 0.86  |       |       |      |       |      |      |      | .98 | .0167 | 1.1 |
| Die PARTEI            | 12   | 0.83  |       |       |      |       |      |      |      | .97 | .0261 | 1.1 |
| DIE LINKE             | 11   | 0.83  |       | -0.22 |      |       |      |      |      | .99 | .0052 | 1.2 |
| Tierschutzpartei      | 33   | 0.81  |       |       |      |       |      |      |      | 1.0 | .0049 | 1.1 |
| GRÜNE                 | 18   | 0.80  |       |       |      |       |      |      |      | .99 | .0112 | 1.1 |
| LfK                   | 20   | 0.77  |       |       |      |       |      |      |      | .81 | .1859 | 1.2 |
| AfD                   | 1    | -0.76 | 0.20  |       |      |       |      |      |      | .97 | .0321 | 1.3 |
| BP                    | 2    | -0.75 | 0.27  |       |      |       |      |      | 0.31 | .96 | .0377 | 2.0 |
| CDU / CSU             | 7    | -0.67 |       | 0.44  |      |       |      |      |      | .88 | .1178 | 2.0 |
| MLPD                  | 24   | 0.65  |       | -0.31 |      | 0.22  |      |      |      | .98 | .0224 | 1.9 |
| BÜNDNIS21             | 4    | -0.53 |       |       | 0.37 |       |      |      |      | .84 | .1624 | 2.7 |
| Bündnis C             | 3    | -0.46 |       | 0.24  | 0.30 |       |      | 0.21 | 0.23 | .87 | .1315 | 3.6 |
| LKR                   | 22   | -0.41 | 0.29  | 0.39  |      |       |      |      |      | .90 | .1050 | 3.3 |
| SPD                   | 30   | 0.41  |       | -0.20 |      | 0.33  |      | 0.30 |      | .91 | .0901 | 4.5 |
| Die Grauen            | 9    | 0.32  | 1.04  |       |      |       |      |      |      | .85 | .1508 | 1.3 |
| dieBasis              | 13   | 0.26  | 0.89  |       |      |       |      |      | 0.35 | .87 | .1298 | 1.7 |
| UNABHÄNGIGE           | 34   |       | 0.88  |       |      |       |      |      |      | .84 | .1551 | 1.2 |
| NPD                   | 25   | -0.54 | 0.73  | -0.24 |      |       |      |      |      | .87 | .1259 | 2.3 |
| III. Weg              | 19   | -0.39 | 0.72  |       |      |       |      |      |      | .93 | .0723 | 1.8 |
| BÜRGERBEWEGUNG        | 5    |       | 0.60  |       |      |       |      | 0.49 |      | .70 | .3005 | 2.1 |
| FDP                   | 16   | -0.23 | -0.22 | 0.86  |      |       |      |      |      | .83 | .1659 | 1.4 |
| FREIE WÄHLER          | 17   |       |       | 0.72  |      |       |      |      |      | .77 | .2277 | 1.3 |
| BüSo                  | 6    |       |       |       | 0.96 |       |      |      |      | .84 | .1577 | 1.1 |
| MENSCHLICHE WELT      | 23   | 0.25  | 0.38  | -0.32 | 0.30 | 0.57  |      |      |      | .89 | .1085 | 3.6 |
| PdF                   | 27   | 0.43  |       | 0.38  |      | 0.52  |      |      |      | .63 | .3705 | 3.0 |
| LIEBE                 | 21   |       |       | 0.28  |      |       | 0.98 |      |      | .95 | .0460 | 1.2 |

|                    | ML1   | ML2  | ML5  | ML7  | ML4  | ML3  | ML8 | ML6  |
|--------------------|-------|------|------|------|------|------|-----|------|
| SS Ladungen        | 19.19 | 4.71 | 3.59 | 1.47 | 1.31 | 1.14 | .69 | .38  |
| Anteilige Var.     | .53   | .13  | .10  | .04  | .04  | .03  | .02 | .01  |
| Kumulative Var.    | .53   | .66  | .76  | .80  | .84  | .87  | .89 | .90  |
| Anteil Erklärt     | .59   | .14  | .11  | .05  | .04  | .04  | .02 | .01  |
| Kumulativer Anteil | .59   | .74  | .85  | .89  | .93  | .97  | .99 | 1.00 |

Mit folgenden Faktorkorrelationen

|     | ML1  | ML2  | ML5  | ML7  | ML4 | ML3 | ML8  | ML6 |
|-----|------|------|------|------|-----|-----|------|-----|
| ML1 | 1.00 | -.46 | -.52 | -.53 | .54 | .09 | -.17 | .05 |

|     |      |      |      |      |      |      |      |      |
|-----|------|------|------|------|------|------|------|------|
| ML2 | -.46 | 1.00 | .25  | .52  | -.06 | .03  | .11  | -.11 |
| ML5 | -.52 | .25  | 1.00 | .15  | -.27 | -.10 | .33  | -.13 |
| ML7 | -.53 | .52  | .15  | 1.00 | -.09 | -.01 | .02  | .08  |
| ML4 | .54  | -.06 | -.27 | -.09 | 1.00 | .10  | .03  | .03  |
| ML3 | .09  | .03  | -.10 | -.01 | .10  | 1.00 | .17  | .40  |
| ML8 | -.17 | .11  | .33  | .02  | .03  | .17  | 1.00 | .28  |
| ML6 | .05  | -.11 | -.13 | .08  | .03  | .40  | .28  | 1.00 |

## Dritte Stichprobe - 7 Faktoren

Standardisierte Ladungsmatrix basierend auf der Korrelationsmatrix

|                       | item | ML1   | ML3   | ML2   | ML6  | ML5  | ML7  | ML4  | h2  | u2    | com |
|-----------------------|------|-------|-------|-------|------|------|------|------|-----|-------|-----|
| PIRATEN               | 28   | 1.13  | 0.24  |       |      |      |      |      | .91 | .0948 | 1.2 |
| Die Humanisten        | 10   | 1.12  | 0.55  |       |      |      |      |      | .80 | .2038 | 1.5 |
| Tierschutzallianz     | 32   | 1.01  |       | 0.41  |      |      |      |      | .90 | .0989 | 1.4 |
| V-Partei <sup>3</sup> | 35   | 1.00  |       |       |      |      |      |      | .99 | .0090 | 1.0 |
| SGP                   | 29   | 0.97  |       |       |      |      |      |      | .98 | .0191 | 1.1 |
| SSW                   | 31   | 0.90  |       |       |      |      |      |      | .86 | .1394 | 1.1 |
| DKP                   | 14   | 0.89  | -0.22 |       |      |      |      |      | .97 | .0265 | 1.2 |
| Die PARTEI            | 12   | 0.89  |       |       |      |      |      |      | .97 | .0302 | 1.1 |
| DiB                   | 8    | 0.88  |       |       |      |      |      |      | .99 | .0134 | 1.1 |
| Tierschutzpartei      | 33   | 0.85  |       |       |      |      |      |      | .99 | .0080 | 1.1 |
| Volt                  | 36   | 0.84  |       |       |      |      |      |      | .94 | .0608 | 1.1 |
| PdF                   | 27   | 0.80  | 0.39  |       |      |      | 0.24 |      | .56 | .4436 | 1.7 |
| ÖDP                   | 26   | 0.80  | -0.27 |       |      |      |      |      | .94 | .0587 | 1.3 |
| du.                   | 15   | 0.79  | -0.26 |       |      |      |      |      | .98 | .0164 | 1.2 |
| DIE LINKE             | 11   | 0.76  | -0.28 |       |      |      |      |      | 1.0 | .0048 | 1.3 |
| LfK                   | 20   | 0.75  |       |       |      |      |      |      | .81 | .1859 | 1.2 |
| GRÜNE                 | 18   | 0.74  | -0.22 |       |      |      |      |      | .99 | .0129 | 1.3 |
| AfD                   | 1    | -0.68 | 0.22  | 0.20  |      |      |      |      | .97 | .0307 | 1.5 |
| MLPD                  | 24   | 0.66  | -0.39 |       |      |      | 0.21 |      | .98 | .0212 | 2.0 |
| BP                    | 2    | -0.61 | 0.21  | 0.26  |      |      |      | 0.31 | .97 | .0280 | 2.5 |
| CDU / CSU             | 7    | -0.57 | 0.55  |       |      |      |      |      | .89 | .1102 | 2.2 |
| Bündnis C             | 3    | -0.52 | 0.30  |       |      |      |      | 0.21 | .80 | .2040 | 2.5 |
| FDP                   | 16   |       | 0.98  | -0.24 |      |      |      |      | .84 | .1638 | 1.2 |
| FREIE WÄHLER          | 17   |       | 0.81  |       |      |      |      |      | .77 | .2289 | 1.2 |
| LKR                   | 22   | -0.35 | 0.47  | 0.29  |      |      |      |      | .90 | .1014 | 3.2 |
| Die Grauen            | 9    | 0.35  |       | 1.03  |      |      |      |      | .85 | .1494 | 1.3 |
| dieBasis              | 13   | 0.24  |       | 0.87  |      |      |      | 0.31 | .84 | .1600 | 1.6 |
| UNABHÄNGIGE           | 34   |       |       | 0.87  |      |      |      |      | .84 | .1621 | 1.1 |
| NPD                   | 25   | -0.52 | -0.26 | 0.70  |      |      |      |      | .87 | .1315 | 2.3 |
| III. Weg              | 19   | -0.44 |       | 0.70  |      |      |      |      | .93 | .0673 | 2.0 |
| BÜRGERBEWEGUNG        | 5    |       |       | 0.66  |      |      | 0.35 |      | .68 | .3233 | 1.9 |
| BüSo                  | 6    | -0.23 |       |       | 0.70 |      |      |      | .63 | .3744 | 1.3 |
| MENSCHLICHE WELT      | 23   | 0.44  | -0.36 | 0.37  | 0.53 |      | 0.25 |      | .87 | .1339 | 4.2 |
| BÜNDNIS21             | 4    | -0.40 | 0.27  |       | 0.44 |      |      |      | .85 | .1527 | 3.1 |
| LIEBE                 | 21   |       | 0.31  |       |      | 0.92 |      |      | .85 | .1545 | 1.3 |

SPD 30 0.46 -0.24 0.51 .91 .0916 2.8

|                    | ML1   | ML3  | ML2  | ML6  | ML5  | ML7 | ML4  |
|--------------------|-------|------|------|------|------|-----|------|
| SS Ladungen        | 18.38 | 4.97 | 4.77 | 1.33 | 1.03 | .85 | .45  |
| Anteilige Var.     | .51   | .14  | .13  | .04  | .03  | .02 | .01  |
| Kumulative Var.    | .51   | .65  | .78  | .82  | .85  | .87 | .88  |
| Anteil Erklärt     | .58   | .16  | .15  | .04  | .03  | .03 | .01  |
| Kumulativer Anteil | .58   | .73  | .88  | .93  | .96  | .99 | 1.00 |

Mit folgenden Faktorkorrelationen

|     | ML1  | ML3  | ML2  | ML6  | ML5  | ML7  | ML4  |
|-----|------|------|------|------|------|------|------|
| ML1 | 1.00 | -.62 | -.42 | -.30 | .21  | .21  | -.16 |
| ML3 | -.62 | 1.00 | .34  | .15  | -.18 | .10  | .05  |
| ML2 | -.42 | .34  | 1.00 | .47  | -.01 | .12  | .06  |
| ML6 | -.30 | .15  | .47  | 1.00 | -.08 | .13  | .10  |
| ML5 | .21  | -.18 | -.01 | -.08 | 1.00 | .12  | .28  |
| ML7 | .21  | .10  | .12  | .13  | .12  | 1.00 | .08  |
| ML4 | -.16 | .05  | .06  | .10  | .28  | .08  | 1.00 |

## Dritte Stichprobe - 6 Faktoren

Standardisierte Ladungsmatrix basierend auf der Korrelationsmatrix

|                       | item | ML1   | ML2  | ML5   | ML6  | ML3  | ML4  | h2  | u2    | com |
|-----------------------|------|-------|------|-------|------|------|------|-----|-------|-----|
| PIRATEN               | 28   | 1.09  |      | 0.22  |      | 0.22 |      | .91 | .0936 | 1.2 |
| Tierschutzallianz     | 32   | 1.05  | 0.43 |       |      |      |      | .90 | .1002 | 1.4 |
| Die Humanisten        | 10   | 1.04  |      | 0.53  |      |      |      | .77 | .2266 | 1.5 |
| SGP                   | 29   | 1.04  |      |       |      |      |      | .99 | .0124 | 1.1 |
| V-Partei <sup>3</sup> | 35   | 0.93  |      |       |      |      |      | .98 | .0200 | 1.1 |
| DKP                   | 14   | 0.92  |      |       |      |      |      | .98 | .0233 | 1.2 |
| SSW                   | 31   | 0.91  |      |       |      |      |      | .85 | .1470 | 1.1 |
| Volt                  | 36   | 0.89  |      |       |      |      |      | .94 | .0631 | 1.0 |
| Die PARTEI            | 12   | 0.88  |      |       |      |      |      | .97 | .0319 | 1.1 |
| DiB                   | 8    | 0.88  |      |       |      |      |      | .99 | .0150 | 1.1 |
| du.                   | 15   | 0.84  |      | -0.22 |      |      |      | .98 | .0180 | 1.1 |
| Tierschutzpartei      | 33   | 0.82  |      |       |      |      |      | .99 | .0094 | 1.2 |
| DIE LINKE             | 11   | 0.81  |      | -0.24 |      |      |      | .99 | .0077 | 1.2 |
| PdF                   | 27   | 0.81  |      | 0.38  |      |      | 0.26 | .55 | .4526 | 1.7 |
| ÖDP                   | 26   | 0.78  |      | -0.25 |      |      |      | .93 | .0693 | 1.2 |
| LfK                   | 20   | 0.77  |      |       |      |      |      | .83 | .1701 | 1.3 |
| BP                    | 2    | -0.76 |      |       |      |      |      | .91 | .0867 | 1.3 |
| GRÜNE                 | 18   | 0.74  |      | -0.22 |      |      |      | .99 | .0116 | 1.4 |
| AfD                   | 1    | -0.74 |      |       |      |      |      | .97 | .0341 | 1.3 |
| MLPD                  | 24   | 0.67  |      | -0.38 |      |      | 0.26 | 1.0 | .0050 | 2.1 |
| CDU / CSU             | 7    | -0.57 |      | 0.51  |      |      |      | .89 | .1131 | 2.1 |
| Bündnis C             | 3    | -0.55 |      | 0.28  | 0.25 |      | 0.21 | .81 | .1887 | 2.4 |

|                  |    |       |       |       |      |       |     |       |     |
|------------------|----|-------|-------|-------|------|-------|-----|-------|-----|
| MENSCHLICHE WELT | 23 | 0.52  | 0.44  | -0.33 | 0.39 | 0.22  | .76 | .2429 | 4.1 |
| SPD              | 30 | 0.51  |       | -0.24 |      | 0.45  | .84 | .1591 | 2.9 |
| Die Grauen       | 9  | 0.33  | 1.07  |       |      |       | .87 | .1298 | 1.3 |
| UNABHÄNGIGE      | 34 |       | 0.92  |       |      |       | .83 | .1672 | 1.0 |
| dieBasis         | 13 |       | 0.80  | 0.25  |      |       | .84 | .1561 | 1.4 |
| BÜRGERBEWEGUNG   | 5  |       | 0.72  | -0.25 |      | 0.22  | .63 | .3675 | 1.6 |
| III. Weg         | 19 | -0.43 | 0.70  |       |      |       | .92 | .0817 | 2.0 |
| NPD              | 25 | -0.56 | 0.69  | -0.26 |      |       | .86 | .1431 | 2.3 |
| FDP              | 16 |       | -0.25 | 0.97  |      |       | .85 | .1540 | 1.2 |
| FREIE WÄHLER     | 17 |       |       | 0.79  |      |       | .78 | .2198 | 1.2 |
| LKR              | 22 | -0.40 | 0.27  | 0.46  |      |       | .87 | .1297 | 3.0 |
| BüSo             | 6  |       |       |       | 0.82 |       | .72 | .2832 | 1.2 |
| BÜNDNIS21        | 4  | -0.35 |       | 0.31  | 0.38 | -0.20 | .83 | .1726 | 4.0 |
| LIEBE            | 21 |       |       | 0.24  |      | 0.62  | .46 | .5404 | 1.5 |

|                    | ML1   | ML2  | ML5  | ML6  | ML3 | ML4  |
|--------------------|-------|------|------|------|-----|------|
| SS Ladungen        | 18.78 | 4.86 | 4.66 | 1.41 | .76 | .69  |
| Anteilige Var.     | .52   | .14  | .13  | .04  | .02 | .02  |
| Kumulative Var.    | .52   | .66  | .79  | .83  | .85 | .87  |
| Anteil Erklärt     | .60   | .16  | .15  | .05  | .02 | .02  |
| Kumulativer Anteil | .60   | .76  | .91  | .95  | .98 | 1.00 |

Mit folgenden Faktorkorrelationen

|     | ML1  | ML2  | ML5  | ML6  | ML3  | ML4  |
|-----|------|------|------|------|------|------|
| ML1 | 1.00 | -.42 | -.60 | -.37 | .09  | .10  |
| ML2 | -.42 | 1.00 | .32  | .51  | .09  | .22  |
| ML5 | -.60 | .32  | 1.00 | .10  | -.07 | .15  |
| ML6 | -.37 | .51  | .10  | 1.00 | -.06 | .19  |
| ML3 | .09  | .09  | -.07 | -.06 | 1.00 | .12  |
| ML4 | .10  | .22  | .15  | .19  | .12  | 1.00 |

## Dritte Stichprobe - 5 Faktoren

Standardisierte Ladungsmatrix basierend auf der Korrelationsmatrix

|                       | item | ML1  | ML3   | ML2  | ML5 | ML4 | h2  | u2    | com |
|-----------------------|------|------|-------|------|-----|-----|-----|-------|-----|
| Die Humanisten        | 10   | 1.09 | 0.55  |      |     |     | .76 | .2372 | 1.5 |
| PIRATEN               | 28   | 1.04 |       |      |     |     | .90 | .1043 | 1.1 |
| Tierschutzallianz     | 32   | 1.03 |       | 0.43 |     |     | .89 | .1063 | 1.4 |
| SGP                   | 29   | 0.97 |       |      |     |     | .98 | .0196 | 1.1 |
| PdF                   | 27   | 0.91 | 0.43  |      |     |     | .48 | .5166 | 1.5 |
| V-Partei <sup>3</sup> | 35   | 0.89 |       |      |     |     | .98 | .0237 | 1.1 |
| SSW                   | 31   | 0.88 |       |      |     |     | .86 | .1449 | 1.1 |
| DKP                   | 14   | 0.88 | -0.23 |      |     |     | .97 | .0271 | 1.2 |
| Volt                  | 36   | 0.85 |       |      |     |     | .94 | .0636 | 1.1 |
| Die PARTEI            | 12   | 0.84 |       |      |     |     | .97 | .0330 | 1.1 |

|                  |    |       |       |       |       |       |       |       |     |
|------------------|----|-------|-------|-------|-------|-------|-------|-------|-----|
| DiB              | 8  | 0.83  | -0.21 |       |       |       | .98   | .0152 | 1.2 |
| du.              | 15 | 0.79  | -0.27 |       |       |       | .98   | .0179 | 1.2 |
| Tierschutzpartei | 33 | 0.78  | -0.23 |       |       |       | .99   | .0108 | 1.2 |
| DIE LINKE        | 11 | 0.77  | -0.28 |       |       |       | .99   | .0077 | 1.3 |
| LfK              | 20 | 0.77  |       |       |       |       | .81   | .1893 | 1.2 |
| ÖDP              | 26 | 0.72  | -0.31 |       |       |       | .93   | .0672 | 1.4 |
| MLPD             | 24 | 0.71  | -0.36 |       |       |       | .94   | .0573 | 1.6 |
| GRÜNE            | 18 | 0.69  | -0.27 |       |       |       | .99   | .0113 | 1.5 |
| AfD              | 1  | -0.68 | 0.24  |       |       |       | .96   | .0352 | 1.5 |
| BP               | 2  | -0.67 | 0.23  |       |       |       | .90   | .1010 | 1.5 |
| SPD              | 30 | 0.60  |       |       | 0.24  | .74   | .2607 | 1.7   |     |
| MENSCHLICHE WELT | 23 | 0.55  | -0.35 | 0.41  | 0.52  |       | .76   | .2425 | 3.6 |
| Bündnis C        | 3  | -0.46 | 0.32  |       | 0.35  | 0.23  | .82   | .1833 | 3.3 |
| FDP              | 16 |       | 0.99  | -0.23 |       |       | .84   | .1632 | 1.1 |
| FREIE WÄHLER     | 17 |       | 0.83  |       |       |       | .77   | .2261 | 1.2 |
| CDU / CSU        | 7  | -0.45 | 0.61  |       |       |       | .87   | .1312 | 1.9 |
| LKR              | 22 | -0.36 | 0.50  | 0.29  |       |       | .88   | .1240 | 2.7 |
| Die Grauen       | 9  | 0.32  |       | 1.08  | -0.21 |       | .88   | .1203 | 1.3 |
| UNABHÄNGIGE      | 34 |       |       | 0.91  |       |       | .83   | .1678 | 1.0 |
| dieBasis         | 13 |       | -0.22 | 0.79  | 0.28  |       | .85   | .1530 | 1.5 |
| III. Weg         | 19 | -0.48 |       | 0.71  |       |       | .88   | .1154 | 1.9 |
| NPD              | 25 | -0.58 | -0.26 | 0.70  |       |       | .85   | .1543 | 2.3 |
| BÜRGERBEWEGUNG   | 5  |       |       | 0.65  |       |       | .54   | .4594 | 1.2 |
| BüSo             | 6  |       |       |       | 0.77  |       | .67   | .3299 | 1.3 |
| BÜNDNIS21        | 4  | -0.30 | 0.33  |       | 0.39  | -0.26 | .84   | .1629 | 4.0 |
| LIEBE            | 21 |       |       |       |       | 0.57  | .39   | .6075 | 1.5 |

|                    | ML1   | ML3  | ML2  | ML5  | ML4  |
|--------------------|-------|------|------|------|------|
| SS Ladungen        | 17.93 | 5.48 | 4.83 | 1.52 | .84  |
| Anteilige Var.     | .50   | .15  | .13  | .04  | .02  |
| Kumulative Var.    | .50   | .65  | .78  | .83  | .85  |
| Anteil Erklärt     | .59   | .18  | .16  | .05  | .03  |
| Kumulativer Anteil | .59   | .76  | .92  | .97  | 1.00 |

Mit folgenden Faktorkorrelationen

|     | ML1  | ML3  | ML2  | ML5  | ML4  |
|-----|------|------|------|------|------|
| ML1 | 1.00 | -.64 | -.41 | -.36 | .14  |
| ML3 | -.64 | 1.00 | .35  | .22  | .02  |
| ML2 | -.41 | .35  | 1.00 | .54  | .15  |
| ML5 | -.36 | .22  | .54  | 1.00 | .09  |
| ML4 | .14  | .02  | .15  | .09  | 1.00 |

## Dritte Stichprobe – 4 Faktoren

Standardisierte Ladungsmatrix basierend auf der Korrelationsmatrix

|                       | item | ML1   | ML3   | ML2   | ML4   | h2  | u2    | com |
|-----------------------|------|-------|-------|-------|-------|-----|-------|-----|
| Die Humanisten        | 10   | 1.15  | 0.55  |       |       | .77 | .2299 | 1.5 |
| Tierschutzallianz     | 32   | 1.03  |       | 0.35  |       | .87 | .1312 | 1.2 |
| PIRATEN               | 28   | 1.01  |       |       |       | .89 | .1075 | 1.1 |
| PdF                   | 27   | 0.93  | 0.43  |       |       | .48 | .5197 | 1.4 |
| SGP                   | 29   | 0.92  |       |       |       | .97 | .0265 | 1.2 |
| SSW                   | 31   | 0.84  |       |       |       | .85 | .1451 | 1.1 |
| DKP                   | 14   | 0.83  | -0.30 |       |       | .97 | .0264 | 1.4 |
| Volt                  | 36   | 0.83  |       |       |       | .93 | .0678 | 1.1 |
| V-Partei <sup>3</sup> | 35   | 0.83  |       |       |       | .97 | .0269 | 1.1 |
| DiB                   | 8    | 0.79  | -0.27 |       |       | .98 | .0203 | 1.2 |
| Die PARTEI            | 12   | 0.79  | -0.23 |       |       | .97 | .0339 | 1.2 |
| LfK                   | 20   | 0.76  | -0.20 |       |       | .80 | .1953 | 1.2 |
| du.                   | 15   | 0.74  | -0.34 |       |       | .98 | .0178 | 1.4 |
| DIE LINKE             | 11   | 0.72  | -0.35 |       |       | .99 | .0074 | 1.5 |
| Tierschutzpartei      | 33   | 0.72  | -0.29 |       |       | .99 | .0120 | 1.4 |
| ÖDP                   | 26   | 0.65  | -0.39 |       |       | .93 | .0662 | 1.7 |
| AfD                   | 1    | -0.64 | 0.30  | 0.22  |       | .96 | .0371 | 1.7 |
| MLPD                  | 24   | 0.63  | -0.43 |       |       | .93 | .0699 | 1.8 |
| GRÜNE                 | 18   | 0.63  | -0.33 |       |       | .99 | .0093 | 1.7 |
| BP                    | 2    | -0.63 | 0.30  | 0.22  |       | .90 | .1049 | 1.8 |
| SPD                   | 30   | 0.55  | -0.23 |       | 0.22  | .73 | .2709 | 1.7 |
| Bündnis C             | 3    | -0.47 | 0.36  | 0.21  | 0.20  | .73 | .2713 | 2.7 |
| BüSo                  | 6    | -0.29 |       | 0.25  |       | .31 | .6872 | 2.7 |
| FDP                   | 16   |       | 1.07  | -0.25 |       | .83 | .1663 | 1.2 |
| FREIE WÄHLER          | 17   |       | 0.91  |       |       | .77 | .2325 | 1.2 |
| CDU / CSU             | 7    | -0.37 | 0.69  |       |       | .87 | .1305 | 1.6 |
| LKR                   | 22   | -0.27 | 0.57  | 0.20  |       | .87 | .1322 | 1.9 |
| BÜNDNIS21             | 4    | -0.30 | 0.36  | 0.27  | -0.27 | .76 | .2382 | 3.8 |
| dieBasis              | 13   |       | -0.23 | 0.97  |       | .80 | .1983 | 1.2 |
| Die Grauen            | 9    | 0.35  |       | 0.94  |       | .79 | .2073 | 1.3 |
| UNABHÄNGIGE           | 34   |       |       | 0.88  |       | .81 | .1891 | 1.0 |
| III. Weg              | 19   | -0.49 |       | 0.72  |       | .89 | .1101 | 1.9 |
| MENSCHLICHE WELT      | 23   | 0.42  | -0.41 | 0.70  |       | .59 | .4052 | 2.4 |
| NPD                   | 25   | -0.57 | -0.23 | 0.66  |       | .84 | .1603 | 2.2 |
| BÜRGERBEWEGUNG        | 5    |       | 0.22  | 0.62  |       | .52 | .4783 | 1.3 |
| LIEBE                 | 21   |       |       | 0.20  | 0.60  | .41 | .5937 | 1.4 |

|                    | ML1   | ML3  | ML2  | ML4  |
|--------------------|-------|------|------|------|
| SS Ladungen        | 16.94 | 6.90 | 5.06 | .78  |
| Anteilige Var.     | .47   | .19  | .14  | .02  |
| Kumulative Var.    | .47   | .66  | .80  | .82  |
| Anteil Erklärt     | .57   | .23  | .17  | .03  |
| Kumulativer Anteil | .57   | .80  | .97  | 1.00 |

Mit folgenden Faktorkorrelationen

|     | ML1  | ML3  | ML2  | ML4 |
|-----|------|------|------|-----|
| ML1 | 1.00 | -.69 | -.42 | .32 |



|     |      |      |      |      |
|-----|------|------|------|------|
| ML3 | -.69 | 1.00 | .39  | -.14 |
| ML2 | -.42 | .39  | 1.00 | -.14 |
| ML4 | .32  | -.14 | -.14 | 1.00 |

## Dritte Stichprobe - 2 Faktoren

Standardisierte Ladungsmatrix basierend auf der Korrelationsmatrix

|                       | item | ML1   | ML2  | h2   | u2   | com |
|-----------------------|------|-------|------|------|------|-----|
| DKP                   | 14   | 1.01  |      | .954 | .046 | 1.0 |
| DiB                   | 8    | 1.00  |      | .979 | .021 | 1.0 |
| du.                   | 15   | 0.99  |      | .977 | .023 | 1.0 |
| Die PARTEI            | 12   | 0.99  |      | .958 | .042 | 1.0 |
| SGP                   | 29   | 0.99  |      | .936 | .064 | 1.0 |
| V-Partei <sup>3</sup> | 35   | 0.98  |      | .954 | .046 | 1.0 |
| DIE LINKE             | 11   | 0.98  |      | .984 | .016 | 1.0 |
| Tierschutzpartei      | 33   | 0.97  |      | .982 | .018 | 1.0 |
| ÖDP                   | 26   | 0.97  |      | .924 | .076 | 1.0 |
| Tierschutzallianz     | 32   | 0.97  | 0.36 | .828 | .172 | 1.3 |
| MLPD                  | 24   | 0.95  |      | .913 | .087 | 1.0 |
| GRÜNE                 | 18   | 0.94  |      | .972 | .028 | 1.0 |
| SSW                   | 31   | 0.94  |      | .819 | .181 | 1.0 |
| PIRATEN               | 28   | 0.93  |      | .784 | .216 | 1.1 |
| Volt                  | 36   | 0.93  |      | .922 | .078 | 1.0 |
| CDU / CSU             | 7    | -0.89 |      | .759 | .241 | 1.0 |
| AfD                   | 1    | -0.88 | 0.22 | .958 | .042 | 1.1 |
| LfK                   | 20   | 0.87  |      | .786 | .214 | 1.0 |
| BP                    | 2    | -0.84 | 0.22 | .876 | .124 | 1.1 |
| SPD                   | 30   | 0.81  |      | .680 | .320 | 1.0 |
| LKR                   | 22   | -0.80 | 0.21 | .794 | .206 | 1.1 |
| Bündnis C             | 3    | -0.72 | 0.22 | .678 | .322 | 1.2 |
| BÜNDNIS21             | 4    | -0.70 | 0.26 | .684 | .316 | 1.3 |
| FDP                   | 16   | -0.68 |      | .407 | .593 | 1.1 |
| Die Humanisten        | 10   | 0.66  |      | .464 | .536 | 1.0 |
| MENSCHLICHE WELT      | 23   | 0.66  | 0.65 | .556 | .444 | 2.0 |
| PdF                   | 27   | 0.56  |      | .288 | .712 | 1.1 |
| FREIE WÄHLER          | 17   | -0.56 | 0.21 | .435 | .565 | 1.3 |
| BüSo                  | 6    | -0.41 | 0.21 | .273 | .727 | 1.5 |
| Die Grauen            | 9    |       | 0.93 | .785 | .215 | 1.0 |
| dieBasis              | 13   |       | 0.92 | .769 | .231 | 1.1 |
| UNABHÄNGIGE           | 34   |       | 0.86 | .834 | .166 | 1.0 |
| III. Weg              | 19   | -0.44 | 0.66 | .827 | .173 | 1.8 |
| BÜRGERBEWEGUNG        | 5    |       | 0.63 | .526 | .474 | 1.2 |
| NPD                   | 25   | -0.46 | 0.59 | .743 | .257 | 1.9 |
| LIEBE                 | 21   |       | 0.24 | .049 | .951 | 1.1 |

|                    | ML1   | ML2  |
|--------------------|-------|------|
| SS Ladungen        | 22.21 | 4.84 |
| Anteilige Var.     | .62   | .13  |
| Kumulative Var.    | .62   | .75  |
| Anteil Erklärt     | .82   | .18  |
| Kumulativer Anteil | .82   | 1.00 |

Mit folgenden Faktorkorrelationen

|     | ML1  | ML2  |
|-----|------|------|
| ML1 | 1.00 | -.35 |
| ML2 | -.35 | 1.00 |

## Dritte Stichprobe - 1 Faktor

Standardisierte Ladungsmatrix basierend auf der Korrelationsmatrix

|                       | item | ML1   | h2    | u2   | com |
|-----------------------|------|-------|-------|------|-----|
| DIE LINKE             | 11   | 0.99  | .9834 | .017 | 1   |
| Tierschutzpartei      | 33   | 0.99  | .9825 | .017 | 1   |
| du.                   | 15   | 0.99  | .9772 | .023 | 1   |
| DiB                   | 8    | 0.99  | .9745 | .026 | 1   |
| GRÜNE                 | 18   | 0.98  | .9665 | .033 | 1   |
| Die PARTEI            | 12   | 0.98  | .9559 | .044 | 1   |
| V-Partei <sup>3</sup> | 35   | 0.98  | .9515 | .049 | 1   |
| DKP                   | 14   | 0.97  | .9361 | .064 | 1   |
| SGP                   | 29   | 0.96  | .9284 | .072 | 1   |
| AfD                   | 1    | -0.96 | .9247 | .075 | 1   |
| ÖDP                   | 26   | 0.96  | .9209 | .079 | 1   |
| Volt                  | 36   | 0.96  | .9189 | .081 | 1   |
| MLPD                  | 24   | 0.96  | .9137 | .086 | 1   |
| BP                    | 2    | -0.92 | .8415 | .159 | 1   |
| SSW                   | 31   | 0.89  | .7994 | .201 | 1   |
| LfK                   | 20   | 0.89  | .7849 | .215 | 1   |
| LKR                   | 22   | -0.87 | .7648 | .235 | 1   |
| CDU / CSU             | 7    | -0.87 | .7561 | .244 | 1   |
| PIRATEN               | 28   | 0.86  | .7436 | .256 | 1   |
| Tierschutzallianz     | 32   | 0.84  | .6973 | .303 | 1   |
| SPD                   | 30   | 0.82  | .6803 | .320 | 1   |
| Bündnis C             | 3    | -0.80 | .6447 | .355 | 1   |
| BÜNDNIS21             | 4    | -0.80 | .6354 | .365 | 1   |
| III. Weg              | 19   | -0.68 | .4690 | .531 | 1   |
| Die Humanisten        | 10   | 0.68  | .4605 | .540 | 1   |
| NPD                   | 25   | -0.67 | .4542 | .546 | 1   |
| FREIE WÄHLER          | 17   | -0.64 | .4038 | .596 | 1   |
| FDP                   | 16   | -0.62 | .3786 | .621 | 1   |

|                  |    |       |       |      |   |
|------------------|----|-------|-------|------|---|
| PdF              | 27 | 0.52  | .2748 | .725 | 1 |
| BüSo             | 6  | -0.49 | .2383 | .762 | 1 |
| UNABHÄNGIGE      | 34 | -0.45 | .2020 | .798 | 1 |
| BÜRGERBEWEGUNG   | 5  | -0.44 | .1898 | .810 | 1 |
| MENSCHLICHE WELT | 23 | 0.41  | .1707 | .829 | 1 |
| Die Grauen       | 9  | -0.21 | .0426 | .957 | 1 |
| dieBasis         | 13 |       | .0304 | .970 | 1 |
| LIEBE            | 21 |       | .0011 | .999 | 1 |

ML1

SS Ladungen 23.00  
 Anteilige Var. .64
