# Supplementary material for: Was misst der Wahl-O-Mat
Source: Atypon-hosted journal article supplement (doi:10.1026/0012-1924/a000330), 2024-04-03
Supplement: 0012-1924_a000330_esm3.pdf [file 0012-1924_a000330_esm3.pdf]

**ESM 3: Auswirkungen alternativer Methoden auf die Ergebnisse des 3D Modells in den drei Stichproben; Ladungstabelle der EFA mit WLS statt ML Schätzmethode.**

Die jeweils erste Tabelle enthält die Ladungen der Übereinstimmungen mit den jeweiligen Parteien auf die drei extrahierten Faktoren. Die jeweils zweite Tabelle beschreibt die Charakteristika der Faktoren inklusive der relativen Varianzaufklärung. Die jeweils dritte Tabelle zeigt die Faktorkorrelationen. Diese Ergebnisse sind weitgehend identisch mit denen der ursprünglichen Methoden.

**Legende:** WLSX = Faktor Nummer X, h2 = Kommunalität, u2 = Unaufgeklärte Varianz an einem Item, com = Hoffmans Komplexitätsindex

**Erste Stichprobe**

Standardisierte Ladungsmatrix basierend auf der Korrelationsmatrix

|                       | item | WLS1  | WLS3  | WLS2  | h2  | u2   | com |
|-----------------------|------|-------|-------|-------|-----|------|-----|
| Tierschutzallianz     | 32   | 0.93  |       | 0.33  | .69 | .309 | 1.3 |
| PIRATEN               | 28   | 0.90  |       |       | .70 | .300 | 1.0 |
| PdF                   | 27   | 0.87  | 0.50  |       | .42 | .576 | 1.6 |
| Die Humanisten        | 10   | 0.86  | 0.42  | -0.27 | .59 | .411 | 1.7 |
| V-Partei <sup>3</sup> | 35   | 0.71  | -0.30 |       | .93 | .065 | 1.3 |
| SPD                   | 30   | 0.71  |       |       | .58 | .418 | 1.1 |
| SSW                   | 31   | 0.69  |       |       | .71 | .286 | 1.1 |
| Die PARTEI            | 12   | 0.67  | -0.36 |       | .91 | .087 | 1.5 |
| SGP                   | 29   | 0.66  | -0.43 |       | .86 | .138 | 1.8 |
| DiB                   | 8    | 0.65  | -0.42 |       | .95 | .048 | 1.7 |
| DKP                   | 14   | 0.64  | -0.49 |       | .90 | .101 | 2.1 |
| Volt                  | 36   | 0.62  | -0.31 |       | .89 | .110 | 1.6 |
| Tierschutzpartei      | 33   | 0.61  | -0.41 |       | .96 | .043 | 1.8 |
| du.                   | 15   | 0.57  | -0.51 |       | .95 | .047 | 2.0 |
| DIE LINKE             | 11   | 0.55  | -0.52 |       | .98 | .024 | 2.0 |
| GRÜNE                 | 18   | 0.50  | -0.46 |       | .94 | .064 | 2.2 |
| LfK                   | 20   | 0.45  | -0.43 |       | .64 | .355 | 2.0 |
| BüSo                  | 6    | -0.41 |       | 0.39  | .35 | .647 | 2.2 |
| FDP                   | 16   |       | 1.01  | -0.22 | .68 | .318 | 1.1 |
| FREIE WÄHLER          | 17   |       | 0.97  |       | .85 | .149 | 1.1 |
| CDU / CSU             | 7    | -0.26 | 0.77  |       | .85 | .152 | 1.3 |
| MLPD                  | 24   | 0.50  | -0.59 |       | .89 | .110 | 2.0 |
| Bündnis C             | 3    | -0.22 | 0.55  | 0.23  | .75 | .247 | 1.7 |
| LKR                   | 22   | -0.28 | 0.55  | 0.25  | .85 | .151 | 1.9 |
| AfD                   | 1    | -0.35 | 0.54  | 0.25  | .94 | .056 | 2.2 |
| ÖDP                   | 26   | 0.47  | -0.53 |       | .85 | .149 | 2.0 |
| BÜRGERBEWEGUNG        | 5    |       | 0.48  | 0.46  | .59 | .410 | 2.1 |
| BP                    | 2    | -0.33 | 0.48  | 0.28  | .85 | .147 | 2.4 |
| LIEBE                 | 21   |       | 0.44  |       | .13 | .869 | 1.3 |
| dieBasis              | 13   |       |       | 0.96  | .81 | .192 | 1.0 |

|                  |    |       |       |      |     |      |     |
|------------------|----|-------|-------|------|-----|------|-----|
| MENSCHLICHE WELT | 23 | 0.31  | -0.42 | 0.86 | .56 | .436 | 1.7 |
| UNABHÄNGIGE      | 34 |       | 0.35  | 0.76 | .83 | .168 | 1.5 |
| Die Grauen       | 9  | 0.26  | 0.35  | 0.72 | .69 | .306 | 1.7 |
| III. Weg         | 19 | -0.24 |       | 0.71 | .84 | .156 | 1.3 |
| NPD              | 25 | -0.29 |       | 0.67 | .78 | .219 | 1.4 |
| BÜNDNIS21        | 4  | -0.25 | 0.25  | 0.45 | .63 | .374 | 2.2 |

|                    |       |       |      |      |
|--------------------|-------|-------|------|------|
|                    |       | WLS1  | WLS3 | WLS2 |
| SS Ladungen        | 11.80 | 10.13 | 5.43 |      |
| Anteilige Var.     | .33   | .28   | .15  |      |
| Kumulative Var.    | .33   | .61   | .76  |      |
| Anteil Erklärt     | .43   | .37   | .20  |      |
| Kumulativer Anteil | .43   | .80   | 1.00 |      |

Mit folgenden Faktorkorrelationen

|      |      |      |      |
|------|------|------|------|
|      | WLS1 | WLS3 | WLS2 |
| WLS1 | 1.00 | -.66 | -.44 |
| WLS3 | -.66 | 1.00 | .54  |
| WLS2 | -.44 | .54  | 1.00 |

## Zweite Stichprobe

Standardisierte Ladungsmatrix basierend auf der Korrelationsmatrix

|                   | item | WLS1  | WLS2 | WLS3 | h2  | u2   | com |
|-------------------|------|-------|------|------|-----|------|-----|
| PIRATEN           | 27   | 1.01  |      | 0.24 | .86 | .145 | 1.1 |
| Tierschutzallianz | 32   | 0.99  | 0.33 |      | .85 | .151 | 1.2 |
| SGP               | 28   | 0.97  |      |      | .90 | .098 | 1.0 |
| V-Partei³         | 35   | 0.97  |      |      | .95 | .048 | 1.0 |
| DiB               | 8    | 0.95  |      |      | .97 | .030 | 1.0 |
| DKP               | 14   | 0.95  |      |      | .93 | .071 | 1.2 |
| Tierschutzpartei  | 33   | 0.95  |      |      | .97 | .032 | 1.0 |
| SSW               | 30   | 0.94  |      |      | .83 | .171 | 1.0 |
| Die PARTEI        | 12   | 0.94  |      |      | .93 | .068 | 1.0 |
| du.               | 15   | 0.94  |      |      | .96 | .042 | 1.0 |
| DIE LINKE         | 11   | 0.93  |      |      | .98 | .024 | 1.0 |
| Volt              | 36   | 0.93  |      |      | .92 | .077 | 1.0 |
| Die Humanisten    | 10   | 0.91  |      | 0.44 | .74 | .259 | 1.5 |
| MLPD              | 23   | 0.90  |      |      | .89 | .112 | 1.1 |
| GRÜNE             | 18   | 0.90  |      |      | .95 | .050 | 1.0 |
| ÖDP               | 25   | 0.90  |      |      | .87 | .130 | 1.0 |
| SPD               | 29   | 0.85  |      |      | .73 | .272 | 1.0 |
| PdF               | 26   | 0.83  |      | 0.63 | .69 | .305 | 1.9 |
| LfK               | 20   | 0.83  |      |      | .68 | .320 | 1.0 |
| AfD               | 1    | -0.68 | 0.29 | 0.24 | .94 | .055 | 1.6 |
| BP                | 2    | -0.58 | 0.36 | 0.20 | .82 | .180 | 2.0 |
| LKR               | 21   | -0.51 | 0.26 | 0.39 | .83 | .170 | 2.4 |

|                  |    |       |       |      |     |      |     |
|------------------|----|-------|-------|------|-----|------|-----|
| Bündnis C        | 3  | -0.44 | 0.26  | 0.37 | .71 | .286 | 2.6 |
| BÜNDNIS21        | 4  | -0.41 | 0.32  | 0.34 | .70 | .298 | 2.9 |
| dieBasis         | 13 |       | 1.02  |      | .82 | .178 | 1.1 |
| UNABHÄNGIGE      | 34 |       | 0.89  |      | .81 | .189 | 1.0 |
| MENSCHLICHE WELT | 22 | 0.54  | 0.88  |      | .66 | .337 | 1.8 |
| Die Grauen       | 9  | 0.26  | 0.88  |      | .71 | .286 | 1.2 |
| III. Weg         | 19 | -0.41 | 0.79  |      | .86 | .140 | 1.6 |
| NPD              | 24 | -0.42 | 0.75  |      | .83 | .169 | 1.6 |
| BÜRGERBEWEGUNG   | 5  |       | 0.62  |      | .47 | .530 | 1.1 |
| BüSo             | 6  | -0.31 | 0.39  |      | .45 | .553 | 2.2 |
| FDP              | 16 |       | -0.26 | 0.91 | .72 | .281 | 1.2 |
| FREIE WÄHLER     | 17 |       |       | 0.81 | .77 | .228 | 1.0 |
| Team Todenhöfer  | 31 | 0.58  |       | 0.70 | .60 | .403 | 2.0 |
| CDU / CSU        | 7  | -0.48 |       | 0.62 | .76 | .238 | 1.9 |

|                    |       |      |      |      |
|--------------------|-------|------|------|------|
|                    |       | WLS1 | WLS2 | WLS3 |
| SS Ladungen        | 19.34 | 5.85 | 3.89 |      |
| Anteilige Var.     | .54   | .16  | .11  |      |
| Kumulative Var.    | .54   | .70  | .81  |      |
| Anteil Erklärt     | .67   | .20  | .13  |      |
| Kumulativer Anteil | .67   | .87  | 1.00 |      |

Mit folgenden Faktorkorrelationen

|      |      |      |      |
|------|------|------|------|
|      | WLS1 | WLS2 | WLS3 |
| WLS1 | 1.00 | -.36 | -.37 |
| WLS2 | -.36 | 1.00 | .54  |
| WLS3 | -.37 | .54  | 1.00 |

## Dritte Stichprobe

Standardisierte Ladungsmatrix basierend auf der Korrelationsmatrix

|                       | item | WLS1 | WLS2 | WLS3  | h2  | u2   | com |
|-----------------------|------|------|------|-------|-----|------|-----|
| PIRATEN               | 28   | 1.01 |      |       | .85 | .147 | 1.1 |
| Tierschutzallianz     | 32   | 1.01 | 0.32 |       | .87 | .133 | 1.2 |
| V-Partei <sup>3</sup> | 35   | 0.98 |      |       | .96 | .045 | 1.0 |
| Die PARTEI            | 12   | 0.97 |      |       | .95 | .048 | 1.0 |
| SSW                   | 31   | 0.96 |      |       | .84 | .162 | 1.0 |
| DiB                   | 8    | 0.96 |      |       | .97 | .027 | 1.0 |
| Tierschutzpartei      | 33   | 0.93 |      |       | .97 | .026 | 1.0 |
| DKP                   | 14   | 0.93 |      |       | .95 | .049 | 1.1 |
| SGP                   | 29   | 0.93 |      |       | .92 | .079 | 1.0 |
| Volt                  | 36   | 0.92 |      |       | .93 | .074 | 1.0 |
| du.                   | 15   | 0.91 |      |       | .97 | .033 | 1.1 |
| GRÜNE                 | 18   | 0.90 |      |       | .96 | .036 | 1.1 |
| DIE LINKE             | 11   | 0.90 |      |       | .98 | .019 | 1.1 |
| ÖDP                   | 26   | 0.89 |      |       | .91 | .087 | 1.1 |
| MLPD                  | 24   | 0.86 |      | -0.23 | .93 | .072 | 1.1 |

|                  |    |       |       |       |      |      |     |
|------------------|----|-------|-------|-------|------|------|-----|
| SPD              | 30 | 0.85  |       | .71   | .293 | 1.0  |     |
| Die Humanisten   | 10 | 0.84  | 0.40  | .67   | .327 | 1.5  |     |
| LfK              | 20 | 0.83  |       | .79   | .210 | 1.0  |     |
| AfD              | 1  | -0.83 |       | .96   | .044 | 1.2  |     |
| BP               | 2  | -0.76 |       | .87   | .131 | 1.3  |     |
| PdF              | 27 | 0.74  | 0.42  | .48   | .521 | 1.6  |     |
| LKR              | 22 | -0.70 | 0.30  | .83   | .174 | 1.4  |     |
| BÜNDNIS21        | 4  | -0.68 | 0.25  | .69   | .309 | 1.3  |     |
| CDU / CSU        | 7  | -0.67 | 0.48  | .87   | .130 | 1.9  |     |
| Bündnis C        | 3  | -0.61 | 0.28  | .71   | .287 | 1.6  |     |
| BüSo             | 6  | -0.47 | 0.26  | .32   | .682 | 1.7  |     |
| dieBasis         | 13 |       | 0.91  | .78   | .218 | 1.0  |     |
| Die Grauen       | 9  |       | 0.83  | 0.22  | .74  | .260 | 1.2 |
| UNABHÄNGIGE      | 34 |       | 0.81  | .81   | .194 | 1.1  |     |
| MENSCHLICHE WELT | 23 | 0.53  | 0.70  | -0.21 | .62  | .380 | 2.1 |
| III. Weg         | 19 | -0.55 | 0.64  | .85   | .146 | 2.0  |     |
| BÜRGERBEWEGUNG   | 5  |       | 0.59  | 0.27  | .55  | .445 | 1.5 |
| NPD              | 25 | -0.58 | 0.58  | .79   | .214 | 2.2  |     |
| FREIE WÄHLER     | 17 | -0.27 | 0.72  | .79   | .213 | 1.3  |     |
| FDP              | 16 | -0.36 | -0.27 | 0.70  | .75  | .246 | 1.8 |
| LIEBE            | 21 |       | 0.34  | .14   | .858 | 2.2  |     |

|                    | WLS1  | WLS2 | WLS3 |
|--------------------|-------|------|------|
| SS Ladungen        | 21.09 | 4.50 | 3.09 |
| Anteilige Var.     | .59   | .13  | .09  |
| Kumulative Var.    | .59   | .71  | .80  |
| Anteil Erklärt     | .74   | .16  | .11  |
| Kumulativer Anteil | .74   | .89  | 1.00 |

Mit folgenden Faktorkorrelationen

|      | WLS1 | WLS2 | WLS3 |
|------|------|------|------|
| WLS1 | 1.00 | -.29 | -.37 |
| WLS2 | -.29 | 1.00 | .20  |
| WLS3 | -.37 | .20  | 1.00 |
