# Supplementary figures and images for: Was misst der Wahl-O-Mat
Source: Atypon-hosted journal article supplement (doi:10.1026/0012-1924/a000330), 2024-04-03

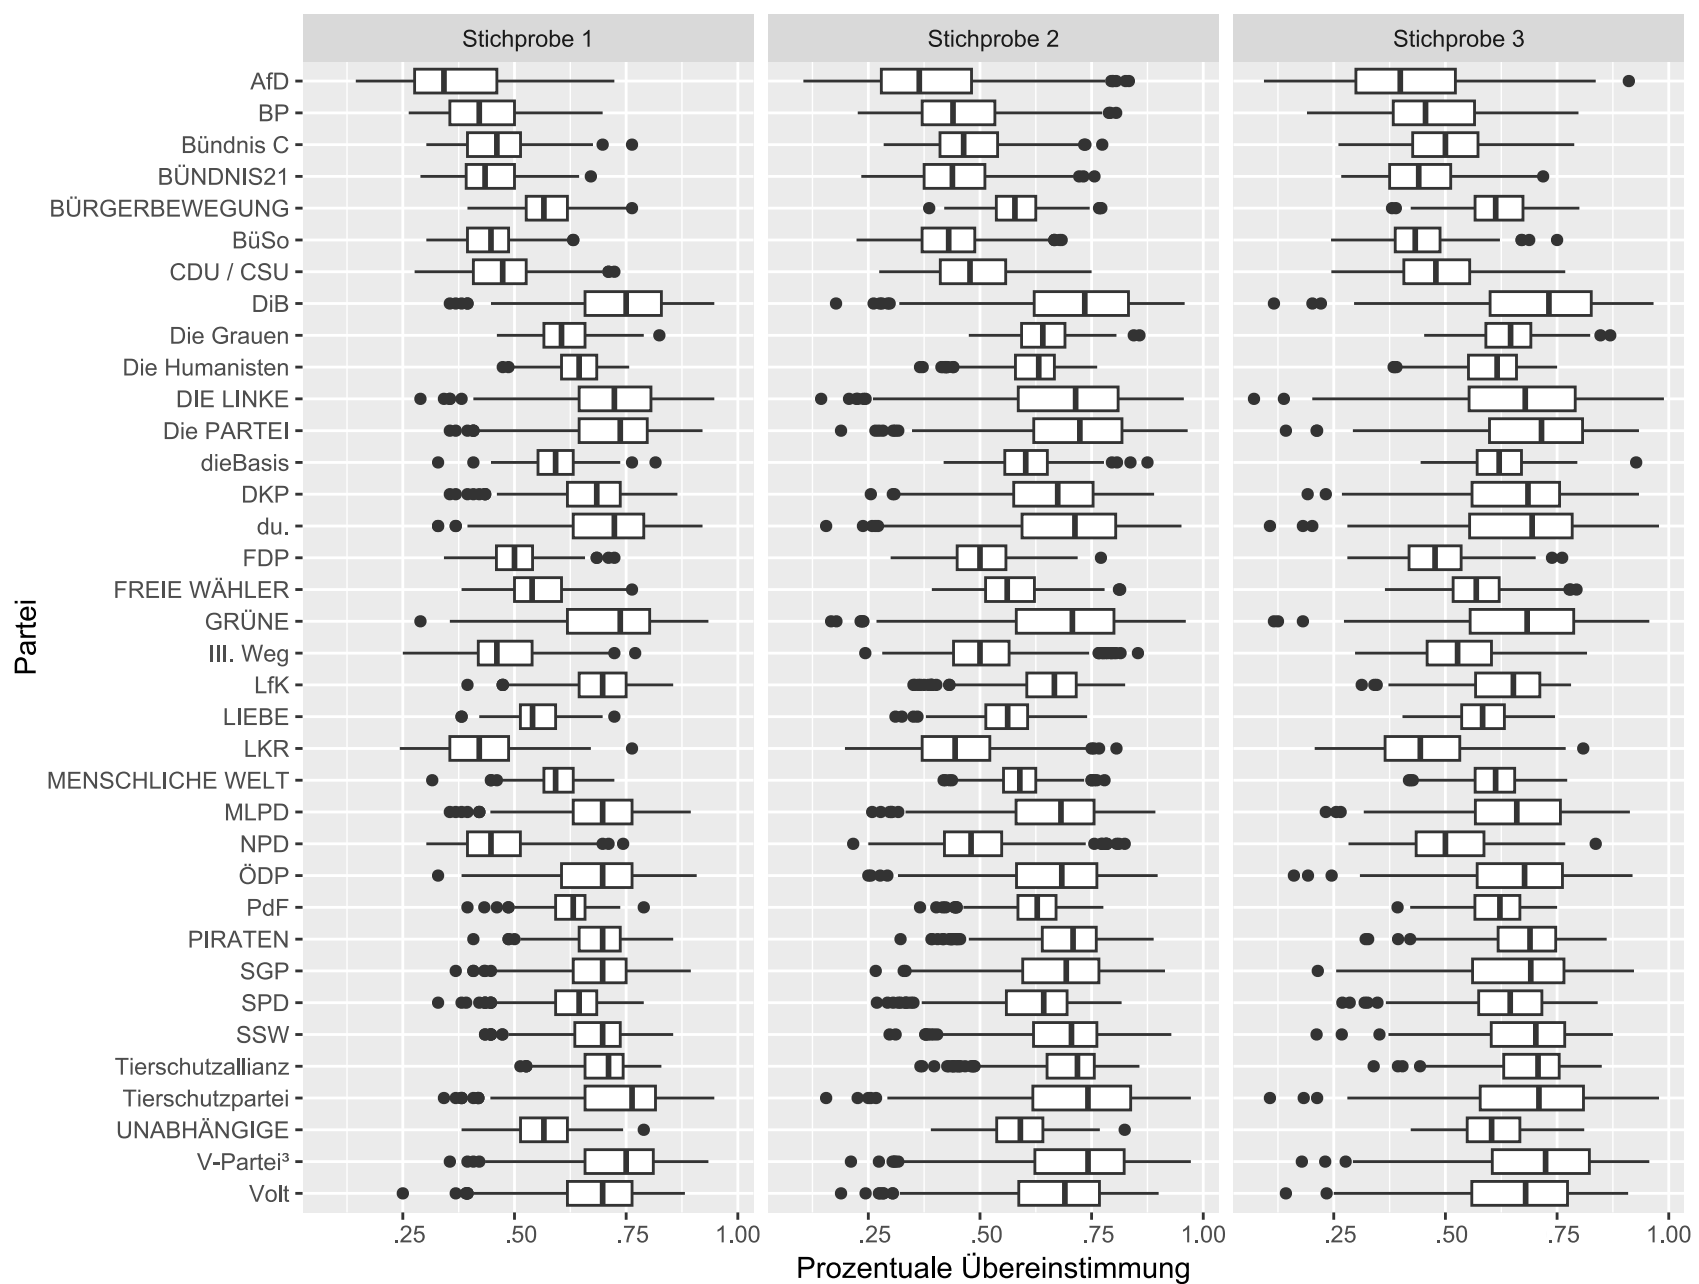

Supplement: 0012-1924_a000330_esm1.pdf [file 0012-1924_a000330_esm1.pdf]
